# Supplementary material
Source: PubMed Central journal article supplement (PMC9363007)
Supplement: NIHMS1823225-supplement-supplement.pdf [file NIHMS1823225-supplement-supplement.pdf]

# Supplement

# Supplementary Appendix

## The 100,000 Genomes Project pilot: impact on rare disease diagnosis in a national healthcare system

### Contents

|    |                                                                                                |    |
|----|------------------------------------------------------------------------------------------------|----|
| 1  |                                                                                                |    |
| 2  |                                                                                                |    |
| 3  |                                                                                                |    |
| 4  | <b>Contents</b>                                                                                |    |
| 5  | <b>Methods</b> .....                                                                           | 3  |
| 6  | <b>Patient recruitment, sample collection and clinical data submission</b> .....               | 3  |
| 7  | <b>DNA sequencing</b> .....                                                                    | 4  |
| 8  | <b>Demographics</b> .....                                                                      | 5  |
| 9  | <b>Diagnostic pipeline</b> .....                                                               | 5  |
| 10 | <b>Analysis of structural variants</b> .....                                                   | 7  |
| 11 | <b>Cohort-wide disease gene discovery</b> .....                                                | 8  |
| 12 | <b>Healthcare benefits</b> .....                                                               | 9  |
| 13 | <b>Comparison to whole exome sequencing</b> .....                                              | 9  |
| 14 | <b>Comparison to NHS Genomic Medicine Service Test Registry</b> .....                          | 10 |
| 15 | <b>Analysis of longitudinal, electronic healthcare records</b> .....                           | 10 |
| 16 | <b>References</b> .....                                                                        | 13 |
| 17 | <b>Figure S1. Virtual panel-based variant filtering and prioritisation pipeline</b> .....      | 15 |
| 18 | <b>Figure S2: Totals of distinct activities during diagnostic odyssey and post genetic</b>     |    |
| 19 | <b>diagnosis periods</b> .....                                                                 | 16 |
| 20 | <b>Table S1. Clinical activity during diagnostic odyssey and post genetic diagnosis</b> .....  | 17 |
| 21 | <b>Table S2. Distribution of secondary care activity of unaffected relatives group: all</b>    |    |
| 22 | <b>activity, APC hospitalisations, outpatient appointments, accident and emergency visits,</b> |    |
| 23 | <b>critical care attendances and diagnostic imaging events.</b> .....                          | 18 |
| 24 | <b>Table S3: Overview of 100,000 Genomes Project Pilot cohort costs of hospital care in</b>    |    |
| 25 | <b>the emergency department, inpatients, outpatients and critical care (intensive care)</b>    |    |
| 26 | <b>depicting costs for all participants, 2676 who are affected and 2146 unaffected people.</b> | 19 |
| 27 | <b>Table S4. Diagnostic yield by disease and family structure</b> .....                        | 20 |
| 28 | <b>Table S5. Diagnostic yield by detailed prior genetic testing</b> .....                      | 28 |
| 29 | <b>Table S6. Diagnostic yield by disease category and most extensive type of prior genetic</b> |    |
| 30 | <b>testing</b> .....                                                                           | 29 |
| 31 | <b>Table S7. Diagnoses enabled by research analysis.</b> .....                                 | 32 |
| 32 | <b>Table S8. Novel disease gene candidates.</b> .....                                          | 36 |
| 33 | <b>Table S9. Reported healthcare benefits</b> .....                                            | 41 |
| 34 | <b>Table S10. Diagnostic odyssey for participant with a <i>TCN2</i> diagnosis.</b> .....       | 45 |
| 35 | <b>Table S11: Diagnostic odyssey for participant with a <i>CTPS1</i> diagnosis.</b> .....      | 46 |

|    |                                                                                                |    |
|----|------------------------------------------------------------------------------------------------|----|
| 36 | <b>Table S12. Pilot diagnostic yield for NHS Genomic Medicine Service clinical indications</b> |    |
| 37 | <b>(&gt;10 pilot cases available).</b> ....                                                    | 47 |
| 38 |                                                                                                |    |
| 39 |                                                                                                |    |

## 40 **Methods**

### 41 **Patient recruitment, sample collection and clinical data submission**

42 After ethical approval (National Research Ethics approvals 14/EE/1112 and 13/EE/032), rare  
43 disease participants were recruited and consented through 9 English NHS hospitals in  
44 partnership with the NIHR BioResource for Rare Diseases as part of the 100,000 Genomes  
45 Project Pilot. Eligible participants were nominated and identified by NHS consultants  
46 (recruiting clinicians), across a range of medical specialties from a broad spectrum of rare  
47 diseases. The selection of rare diseases was deliberately inclusive of disorders both a putative  
48 oligogenic basis and more complex aetiology as well as likely Mendelian single gene disorders  
49 to test the broad utility of whole genome sequencing. Additional family members, especially  
50 parents, were recruited where feasible according to the suggested guidelines for the specific  
51 disease. Recruitment was undertaken by a whole range of clinical practitioners (doctors,  
52 clinical/research nurses, geneticists, genetic counsellors, research practitioners) in the  
53 National Health Service and included patient media response and historical lists. Consent and  
54 collection of germline samples were secured using the preferred face to face route, during  
55 routine clinic appointments, inpatient admissions, or by a project specific appointment. In  
56 some circumstances a pre-arranged telephone call was used to obtain consent and postal  
57 bloods were dispatched. In all cases, the youngest affected member of the family with a  
58 sample collected was assigned as proband and family members were recruited following the  
59 proband. Where participants were under 16 years, recruitment took place in specialized  
60 children's facilities and parents legally consented along with assent from the child where  
61 possible. Those who were judged to have lost capacity were consented via advice from next  
62 of kin or with a professional consultee to ensure there was no loss of amenity to rare disease  
63 sufferers.

64 This pilot informed the 100,000 Genomes Project Main Programme where we have  
65 completed sequencing for 116,000 whole genomes including more than 83K from the rare  
66 disease patients and their families with the rest for cancer patients. These are still being  
67 validated for diagnostic reporting and we do not currently have the data for the  
68 comprehensive analysis presented here on the pilot for the Main Programme.

69

70 **DNA sequencing**

71 Samples were received as either DNA extracted from whole blood or as whole blood EDTA  
72 samples, which were used for extraction at the National Institutes for Health Research  
73 BioResource Laboratory in Cambridge. Samples were tested for adequate DNA concentration  
74 (Picogreen), quality controlled (QC) for degradation (gel electrophoresis) and purity (OD  
75 260/280; Trinean) before selection for WGS. DNA samples were prepared at a minimum  
76 concentration of 30 ng/ $\mu$ l in 110  $\mu$ l, visually inspected for degradation and had to have an OD  
77 260/280 between 1.75 and 2.04. They were then prepared in batches of 96 and shipped on  
78 dry ice to the sequencing partner Illumina Laboratory Services (Illumina Inc, Great  
79 Chesterford, UK). Further sample QC was performed by Illumina Laboratory Services to  
80 ensure that the concentration of the DNA was > 30 ng/ $\mu$ l and that every sample generated  
81 high quality genotyping results (Illumina Infinium Human Core Exome microarray). Any  
82 samples with a repeated array genotyping call rate < 0.99, high levels of cross-contamination,  
83 mismatches with the declared gender that could not be resolved by further investigation, or  
84 for which consent had been withdrawn, were excluded from this study. The genotyping data  
85 were also used for positive sample identification and sample identity was verified before data  
86 delivery. In short, 0.5  $\mu$ g of the DNA sample was fragmented using Covaris LE220 (Covaris Inc.,  
87 Woburn, MA, USA) to obtain an average size of 450bp DNA fragments. DNA samples were  
88 processed using the Illumina TruSeq DNA Polymerase Chain Reaction-Free Sample  
89 Preparation kit (Illumina Inc., San Diego, CA, USA) on the Hamilton Microlab Star (Hamilton  
90 Robotics, Inc, Reno, NV, USA). The final libraries were checked using the Roche LightCycler  
91 480 II (Roche Diagnostics Corporation, Indianapolis, IN, USA) with KAPA Library Quantification  
92 Kit (Kapa Biosystems Inc., Wilmington, MA, USA) for concentration. From February 2014 to  
93 June 2017, three read lengths were used: 100bp, 125bp and 150bp (377, 3,154 and 9,656  
94 samples, respectively). Samples sequenced with 100bp and 125bp reads utilised three and  
95 two lanes of an Illumina HiSeq 2500 instrument, respectively, while samples sequenced with  
96 150bp reads utilised a single lane of a HiSeq X instrument. At least 95% of the autosomal  
97 genome had to be covered at 15X and a maximum of 5% of insert sizes had to be less than  
98 twice the read length. Following sample and data QC at Illumina Laboratory Services, WGS  
99 data files were received at Genomics England for further QC. The WGS data returned by the  
100 sequencing provider underwent a series of processing steps. Briefly, contamination was  
101 estimated using VerifyBamID<sup>1</sup> and sex karyotypes were inferred from the ratios of mean X

102 and Y chromosome to autosomal coverage. Pairwise identity by descent coefficients were  
103 estimated within families using --genome from PLINK 1.9<sup>2</sup> and pairwise kinship coefficients  
104 across the cohort using the --kinship algorithm from KING<sup>3</sup>. This information was used to  
105 check for repeat sample submissions and sample swaps and consistency with reported family  
106 structure. A final dataset of 4,660 samples was obtained for downstream analysis.

107

## 108 **Demographics**

109 Demographic data for participants were collected from clinical notes or episodes, electronic  
110 patient records or from next of kin. To address incomplete record of self-reported ethnicity,  
111 we performed an analysis of the genomes to assign ancestry. Thirty thousand autosomal  
112 SNVs with a minor allele frequency > 5% and passing our site quality filters for depth,  
113 missingness, allelic imbalance and Hardy Weinberg Equilibrium deviations were selected  
114 based on presence in the participant genomes and the 1000 Genomes Project phase 3 where  
115 broad and fine-grained ancestry is known for each person. Principal components from the  
116 1000 Genomes data were calculated and the 100KGP data projected onto these. A random  
117 forest model (randomForest R package, ntree=80, and a probability threshold of 90) based on  
118 6 of the principal components and the known 5 super-populations described for the 1000  
119 Genomes data (European, African, East Asian, South Asian and American) was trained and  
120 used to infer ancestry of our genomes (assigning the super-population with the highest  
121 probability from the model). The assigned ancestries showed a good correspondence with  
122 the available self-reported ethnicities for 435 probands where only 6 had conflicts.

123

## 124 **Diagnostic pipeline**

125 We created an automated pipeline to prioritise likely candidate variants based on virtual gene  
126 panels and this was used as the primary means of identifying diagnoses (Figure S1). This  
127 pipeline is described in more detail at <https://www.genomicsengland.co.uk/?wpdmdl=15664>  
128 . Briefly, the pipeline first removes variants that do not segregate as expected for a causative  
129 variant in the family (or without strong evidence for being *de novo*), do not affect protein  
130 coding sequences, and those that are common (recessive disease models: > 1% in external  
131 and local datasets; dominant disease models: > 0.1% in ExAC<sup>4</sup>, ESP\_6500<sup>5</sup>, UK10K<sup>6</sup> and local  
132 datasets or > 0.2% in GONL<sup>7</sup> and 1000g<sup>8</sup> datasets). Modes of segregation considered included

133 autosomal biallelic (simple recessive, compound heterozygous, uniparental isodisomy) and  
134 monoallelic (inherited or *de novo*), X-linked biallelic or monoallelic, and mitochondrial  
135 genome. Paternal and maternal imprinting were considered for autosomal monoallelic  
136 inherited mode for a small number of genes curated as relevant in PanelApp. *De novo* variant  
137 calling was performed using the relevant Platypus script with hard filters applied (maximum  
138 fraction of reads supporting the alternate allele in parent is 3%; minimum fraction of reads  
139 supporting the alternate allele in child is 20%;  $\geq 2$  reads support the alternate allele in the  
140 child; results of a Bayesian factor method shows the likelihood that the variant is *de novo* is  
141 greater than the likelihood it is not *de novo* based on GL values for the trio and prior  
142 probability).

143

144 Variants affecting genes that are known to be involved in the proband's condition(s), including  
145 variants with the expected mode of inheritance for the gene and disease, are then prioritized  
146 by the application of virtual gene panels to the filtered results. These gene panels have been  
147 created for each recruited disease category through an expert, crowd-sourced review and  
148 internal curation process, facilitated by our PanelApp software.<sup>9</sup> Medical review of each  
149 family's pedigree and phenotypes was performed by our clinical team to assess whether  
150 additional panels beyond the recruited disease should be applied. They also assessed whether  
151 incomplete penetrance was a possibility or whether multiple monogenic conditions could be  
152 present. High impact variants or moderate impact *de novo* variants affecting genes in the  
153 applied panels were classified as tier 1 candidates, moderate impact variant types such as  
154 missense variants affecting the panel genes were otherwise classified as tier 2, and all other  
155 high or moderate impact filtered variants classified as tier 3. Identifying the appropriate  
156 panels for each case and keeping panels up to date is challenging, and in the case of larger  
157 panels such as for intellectual disability, can still result in many candidate variants.

158

159 To address these challenges and limit the possibility of overlooking, or inefficiently prioritising  
160 diagnoses, we also ran a parallel phenotype-based, variant prioritisation pipeline using the  
161 Exomiser software package (version 12.1.0 with 1909 databases).<sup>10</sup> Panel-based and Exomiser  
162 candidates were presented back to the recruiting clinicians in each regional Genomic  
163 Medicine Centre (GMC) via decision support systems provided by Congenica and Fabric  
164 Genomics. The latter also includes VAAST and Phevor, two gene prioritization algorithms

165 describing a gene burden test and using a proband's phenotype in genome analysis.<sup>11,12</sup> For  
166 cases processed by Congenica and Fabric Genomics, their clinical genetics teams also  
167 performed a review of each case and highlighted potentially pathogenic variants outside the  
168 gene panels that had been assigned at the medical review stage. Variants were reviewed by  
169 a clinical laboratory scientist in conjunction with the recruiting clinician and/or a clinical  
170 geneticist and classified according to the American College of Medical Genetics Guidelines.<sup>13</sup>  
171 Following variant review and classification, a diagnostic report was issued for each family. The  
172 final outcomes were captured in terms of whether a genetic diagnosis was obtained, the  
173 variants(s) involved and whether they explained all or just some of the phenotypes.

174 100KGP participants can opt in to receive secondary findings on predisposition to a  
175 range of cancers and familial hypercholesterolaemia but as we have not yet returned these yet  
176 at the request of the NHS we cannot report those results here.

177

#### 178 **Analysis of structural variants**

179 MANTA<sup>14</sup> was used to call copy number (CNV) and structural variant (SV) calls, and CANVAS<sup>15</sup>  
180 used to identify >10 kB CNVs from our whole genome sequencing. Review of these calls was  
181 performed for the pilot cases, alongside analysis to either (i) look for a second CNV/SV variant  
182 in cases where a strong SNV candidate was identified in a bi-allelic gene on the applied panels,  
183 or (ii) systematically triage high quality CNV/SVs for all cases. For the latter, the calls first  
184 underwent quality control. Autosomal CANVAS calls were selected that passed the Illumina  
185 filters as well as hard filters on genotype quality, paired-end reads, repeat content, overlap  
186 problematic region, distance to the nearest segmental duplication, and distance to the  
187 nearest assembly gap. We used a novel random forest method for filtering of structural  
188 variants by quality of the calls. The training set consisted of 3,127,014 SV calls from 100 trios.  
189 For the purpose of training, a “high quality” SV call was defined as inherited (i.e. present in at  
190 least one parent) call with a population frequency below 10%. 80% of data was used for  
191 training and 20% for testing. The following variables were used to train the model and make  
192 the predictions: genotype quality, paired-end read support on left breakpoint, paired-end  
193 read support on right breakpoint, the genotype (‘0/1’ or ‘1/1’), FILTER value, presence of any  
194 overlap with Canvas call, the minimum repeat content between the two breakpoints, the  
195 maximum repeat content between the two breakpoints, the proportion of the call  
196 overlapping a “problematic” region, the distance to the nearest segmental duplication and



197 the distance to the nearest assembly gap (centromere/telomere and other gaps). Repeat  
198 content was taken from the Repeat Masker UCSC track. A “problematic” region was the  
199 region where >10% of the SV calls in the probands in the population were not present in at  
200 least one parent. The CANVAS and MANTA calls were further filtered to only those  
201 overlapping the exons and untranslated regions (UTRs) of genes in the applied panels, and  
202 internal frequency < 0.01. For monallelic genes, only MANTA heterozygous or CANVAS copy  
203 number = 1 or 3 calls were considered. For biallelic genes, only homozygous calls or cases  
204 where a second variant was observed in the other allele were kept. Finally, calls were  
205 visualized and those that appeared genuine were reviewed in multi-disciplinary team (MDT)  
206 sessions and validated by Sanger sequencing for smaller CNVs and array comparative genomic  
207 hybridization (CGH) for larger CNVs.

208

#### 209 **Cohort-wide disease gene discovery**

210 A statistical framework was developed to detect enrichment of rare, predicted pathogenic  
211 variants in novel genes for specific diseases. The framework was run on all rare (< 0.1%  
212 dominant, < 1% recessive), coding variants that segregated with disease as expected for each  
213 possible mode of inheritance as filtered by Exomiser. A cohort was defined as all cases  
214 recruited under one of our specific disease categories and controls as all recruited probands  
215 except those under the broader category containing this disease in our rare disease hierarchy  
216 (Supplementary table 1) e.g. intellectual disability cases were compared to all non-  
217 neurological cases as controls.

218 To increase the power of this analysis we incorporated results from all 27,591 rare  
219 disease cases (57,002 genomes) available at the time of analysis (March 2019) in the 100KGP  
220 dataset. To maintain statistical validity and power, the analysis was limited to those disease-  
221 gene associations where at least five cases exist for the disease and where relevant variants  
222 in the gene were seen in at least four cases over the entire cohort. We used right-tailed  
223 Fisher’s exact tests to assess the enrichment of variants under four separate scenarios: (i)  
224 rare, predicted damaging variants (Exomiser variant score > 0.8 corresponding to rare variants  
225 that are either loss of function (LoF) or missense variants predicted to be pathogenic by REVEL  
226 and/or MVP (ii) rare, predicted pathogenic variants, in a constrained coding region (CCR)<sup>16</sup>,  
227 (iii) rare, predicted LoF variants, (iv) rare, *de novo* variants. For the latter, only trios or larger  
228 family structures where *de novo* calling was possible were considered. The Benjamini and

229 Hochberg method<sup>17</sup> was used to correct for multiple testing (total number of tests: 590,451);  
230 an overall false discovery rate adjusted (q-value) threshold of 0.10 was used for claiming  
231 significant gene-disease associations. In order to obtain a distribution of the number of  
232 discoveries under the null, we randomly permuted the case/control label 10,000 times and  
233 calculated the number of discoveries on the 10,000 permuted datasets using the same  
234 burden testing approach. Novel associations were defined as those involving genes that are  
235 not present in the PanelApp gene panel for the specific disease category (any level of  
236 evidence) and not in OMIM<sup>18</sup>, for any related disorder. For associations being pursued further,  
237 such as the 22 associations described in Table S5, we searched PubMed to establish that there  
238 were not recent publications describing the associations.

239

#### 240 **Healthcare benefits**

241 For a case to be closed and reported upon in the the 100KGP portal, an online form with built  
242 in validation has to be completed (reporting questionnaire) and data is therefore available for  
243 all cases. Details of the gene and variants involved in any diagnosis are collected alongside  
244 the resulting healthcare benefits in terms of any change in medication, additional surveillance  
245 for proband or relatives, clinical trial eligibility or whether it informs future reproductive  
246 choices. This data was queried in our internal database for all diagnoses reported in this study.

247

248

#### 249 **Comparison to whole exome sequencing**

250 To allow a comparison of how many of our SNV/indel diagnoses from a WGS pipeline would  
251 have been detected by whole exome sequencing (WES) we analysed how many of the coding  
252 and non-coding SNV/indel diagnosed lay outside the regions detectable by such an approach.  
253 Exome targets were defined as those regions with at least 10x median coverage in gnomAD<sup>19</sup>,  
254 ([https://storage.googleapis.com/gnomad-](https://storage.googleapis.com/gnomad-public/release/2.1/coverage/exomes/gnomad.exomes.coverage.summary.tsv.bgz)  
255 [public/release/2.1/coverage/exomes/gnomad.exomes.coverage.summary.tsv.bgz](https://storage.googleapis.com/gnomad-public/release/2.1/coverage/exomes/gnomad.exomes.coverage.summary.tsv.bgz)) or from  
256 1000 samples from the Deciphering Developmental Disorders (DDD)<sup>20</sup> project that were all  
257 sequenced using the single WES capture kit (Matthew Hurles and Eugene Gardner, personal  
258 communication) as 10x median coverage is predicted to give 95% sensitivity.<sup>21</sup>

259

260 **Use of these data in developing the NHS Genomic Medicine Service Test Registry**

261 A test registry of clinical indications, where whole genome sequencing is the preferred  
262 diagnostic test, has recently been established by the NHS for its new Genomics Medicine  
263 Service (<https://www.england.nhs.uk/publication/national-genomic-test-directories/>). The  
264 100KGP clinical team identified the recruited disease categories mapping to each of these  
265 indications to allow an estimation of likely diagnostic yield from WGS based on this study as  
266 shown in Table S8. This information informed selection of disorders for the NHS Genomic Test  
267 Directory.

268 **Analysis of longitudinal, electronic healthcare records**

269 The 100KGP consent model enables the collection of longitudinal healthcare records from  
270 registries and data repositories serviced nationally by NHS Digital and Public Health England.  
271 The primary function of these datasets is to provide epidemiological datasets, monitoring  
272 activity resource allocated to NHS clinical pathways to support commissioning of secondary  
273 care services (treatment provided by healthcare professionals who do not have the first  
274 contact with the patient). Standardized coding of diagnoses, procedures and interventions  
275 alongside quality assured demographic and administrative meta-data are also of high value  
276 to clinical research and medical decision support. Hospital Episode Statistics (HES), Diagnostic  
277 Imaging Dataset (DID) and Office of National Statistics (ONS) Mortality Register records were  
278 received by NHS Digital on a quarterly basis and covering the entirety of the 100KGP patients  
279 registered in England. The DID contains metadata collected from local radiology information  
280 systems (RIS) for a range of imaging activities from the year 2000 onwards. ONS mortality  
281 data with information - including cause of death – was extracted from the death certificate  
282 for all deaths registered in England and Wales since 1995. Our volume of HES publications  
283 includes:

- 284 • Admitted Patient Care (APC) records covering admitted patient care activity in English  
285 NHS hospitals and English NHS-commissioned activity in the independent sector from  
286 1995 onwards.
- 287 • Outpatients (OP) records covering appointments at outpatient services from 2003  
288 onwards.
- 289 • Adult Critical Care (ACC) records linking hospital admissions to use of critical care  
290 facilities from 2008 onwards.

291 • Accident and Emergency (AE) records covering attendance at Accident & Emergency  
292 units from 2007 onwards.

293 These data were then used to study the healthcare benefits achieved by genetic testing, and  
294 WGS in particular, by compiling the longitudinal activity for our cohort of rare disease patients  
295 to:

- 296 • Provide an overview of the probands' diagnostic odyssey.
- 297 • Assess impact on secondary healthcare resources, particularly in contrast to unaffected  
298 siblings.
- 299 • Highlight potential patterns in NHS hospital activity within disease categories.

300 A similar compendium of longitudinal activity for a control group of unaffected relatives  
301 from the UK 100,000 Genomes Project cohort was also compiled and used as a comparison.  
302 Due to the different commencement dates for collection of these datasets, longitudinal  
303 record analysis was restricted to probands with life-long activity captured in the datasets  
304 included. The cut-off birth year for the eligible patients was set to 2003 resulting in a total of  
305 379 patients for the proband group and 318 for the young unaffected relatives group.

306 For each one of the participants in the longitudinal study the total number of records within  
307 APC, OP, AE, CC, DID datasets were assembled and ordered chronologically. Presence or  
308 absence of an entry in the mortality outcomes (ONS) dataset was checked. The assembled  
309 activity was inspected by a team of clinicians to mark the record signifying the likely start of  
310 odyssey (LSO) of the proband's engagement with healthcare services. The second milestone  
311 highlighted for the patient's journey was the date when genetic diagnosis (GD) was achieved,  
312 or for the unresolved cases, the last date of HES data we had available (31/07/2019). The  
313 same date (31/07/2019) was also the overall cut-off date for the longitudinal study. Using  
314 these time points, three periods of interest were defined for the 172 out of 379 patients in  
315 the proband group that had received a diagnosis, in line with the study's objectives:

- 316 1. Birth to likely start of odyssey (LSO).
- 317 2. LSO to Resolution/Genetic Diagnosis (or cut-off date)
- 318 3. Resolution to cut-off date.

319 For the control group of unaffected relatives only the period of clinical activity from birth to  
320 cut-off date was defined.

321 Clinical activity was grouped by type - hospital admissions (APC), outpatient appointment  
322 (OP), attendance to A&E department (AE), episodes in a critical care unit (CC), order of  
323 diagnostic image (DID) - every record counting as one episode. The medians were extracted  
324 for each of the groups, as well as a block for each period of interest. For the proband group,  
325 summaries are available for the whole group as well as for diseases that number more than  
326 5 probands, both split by whether GMC decision (following genetic diagnosis) was achieved  
327 or not by the time of publication.

328 In addition to the longitudinal analysis of electronic health records, the cost of all secondary  
329 care for the cohorts of probands and unaffected relatives was calculated. This analysis was  
330 based on the available HES data (admitted patient care, outpatient attendances, accident and  
331 emergency presentations and critical care admissions), not the data from the DID. Each of the  
332 HES datasets was cleaned to facilitate processing through the Healthcare Resource Group  
333 (HRG) Reference Costs Grouper.<sup>22</sup> This software uses an algorithm that creates a hierarchy of  
334 mandatory/required fields from each HES dataset to group patient activity and derive  
335 appropriate HRG codes for each observation. Following the assignment of HRG codes to each  
336 observation, unit costs from the National Schedule of Reference Costs<sup>23</sup> were also attached.  
337 As the study period encompassed data over multiple years, we used the same HRG grouping  
338 algorithm for data in all years to ensure that changes in costs were from changes in utilisation  
339 and not from changes within the HRG algorithm or reference costs. We therefore used the  
340 HRG4+ 2016/17 Reference Costs Grouper and the 2016/17 National Schedule of Reference  
341 Costs. We then summarised the secondary care costs for the two cohorts both overall, and  
342 by type of care, calculating mean and median values.

343 **References**

- 344 1. Jun G, Flickinger M, Hetrick KN, et al. Detecting and estimating contamination of human  
345 DNA samples in sequencing and array-based genotype data. *Am J Hum Genet.*  
346 2012;91(5):839-848.
- 347 2. Chang CC, Chow CC, Tellier LC, Vattikuti S, Purcell SM, Lee JJ. Second-generation PLINK:  
348 rising to the challenge of larger and richer datasets. *Gigascience.* 2015;4:7.
- 349 3. Manichaikul A, Mychaleckyj JC, Rich SS, Daly K, Sale M, Chen WM. Robust relationship  
350 inference in genome-wide association studies. *Bioinformatics.* 2010;26(22):2867-2873.
- 351 4. Karczewski KJ, Weisburd B, Thomas B, et al. The ExAC browser: displaying reference data  
352 information from over 60 000 exomes. *Nucleic Acids Res.* 2017;45(D1):D840-D845.
- 353 5. Exome Variant Server, NHLBI GO Exome Sequencing Project (ESP), Seattle, WA (URL:  
354 <http://evs.gs.washington.edu/EVS/>)
- 355 6. UK10K project. <https://www.uk10k.org/>
- 356 7. Boomsma DI, Wijmenga C, Slagboom EP, et al. The Genome of the Netherlands: design,  
357 and project goals. *Eur J Hum Genet.* 2014;22(2):221-227.
- 358 8. A global reference for human genetic variation, The 1000 Genomes Project Consortium,  
359 *Nature* 526, 68-74 (01 October 2015) doi:10.1038/nature15393.
- 360 9. Martin, A.R., Williams, E., Foulger, R.E. et al. PanelApp crowdsources expert knowledge  
361 to establish consensus diagnostic gene panels. *Nat Genet* **51**, 1560–1565 (2019).
- 362 10. Smedley D, Jacobsen JO, Jäger M, et al. Next-generation diagnostics and disease-gene  
363 discovery with the Exomiser. *Nat Protoc.* 2015 Dec;10(12):2004-15.
- 364 11. Yandell M, Huff C, Hu H, et al. A probabilistic disease-gene finder for personal  
365 genomes. *Genome Res.* 2011;21(9):1529-1542.
- 366 12. Singleton MV, Guthery SL, Voelkerding KV, et al. Phevor combines multiple biomedical  
367 ontologies for accurate identification of disease-causing alleles in single individuals and  
368 small nuclear families. *Am J Hum Genet.* 2014;94(4):599-610.
- 369 13. Richards S, Aziz N, Bale S, Bick D et al; ACMG Laboratory Quality Assurance Committee.  
370 Standards and guidelines for the interpretation of sequence variants: a joint consensus  
371 recommendation of the American College of Medical Genetics and Genomics and the  
372 Association for Molecular Pathology. *Genet Med.* 2015; 17(5):405-24. doi:  
373 10.1038/gim.2015.30.
- 374 14. Zhang L, Bai W, Yuan N, Du Z. Comprehensively benchmarking applications for detecting  
375 copy number variation. *PLoS Comput Biol.* 2019 May 28;15(5):e1007069. doi:  
376 10.1371/journal.pcbi.1007069. eCollection 2019 May. Erratum in: *PLoS Comput Biol.* 2019  
377 Sep 20;15(9):e1007367.
- 378 15. Kosugi S, Momozawa Y, Liu X, Terao C, Kubo M, Kamatani Y. Comprehensive evaluation of  
379 structural variation detection algorithms for whole genome sequencing. *Genome Biol.*  
380 2019 Jun 3;20(1):117.
- 381 16. Havrilla JM, Pedersen BS, Layer RM, Quinlan AR. A map of constrained coding regions in  
382 the human genome. *Nat Genet.* 2019 Jan;51(1):88-95.
- 383 17. Benjamini Y, Hochberg Y. Controlling the false discovery rate: a practical and powerful  
384 approach to multiple testing. *Journal of the Royal Statistical Society, Series B.* 1995. 57 (1):  
385 289–300.
- 386 18. Online Mendelian Inheritance in Man, OMIM®. McKusick-Nathans Institute of Genetic  
387 Medicine, Johns Hopkins University (Baltimore, MD). <https://omim.org/>

- 388 19. Karczewski, K.J., Francioli, L.C., Tiao, G. *et al.* The mutational constraint spectrum  
389 quantified from variation in 141,456 humans. *Nature* 581, 434–443 (2020).
- 390 20. Wright CF, Fitzgerald TW, Jones WD, et al. Genetic diagnosis of developmental disorders  
391 in the DDD study: a scalable analysis of genome-wide research data. *Lancet*.  
392 2015;385(9975):1305-1314.
- 393 21. Meynert AM, Bicknell LS, Hurles ME, Jackson AP, Taylor MS. Quantifying single nucleotide  
394 variant detection sensitivity in exome sequencing. *BMC Bioinformatics*.2013 Jun  
395 18;14:195.
- 396 22. National Casemix Office. *Grouper User Manual - HRG4+ 2016/17 Reference Costs Grouper*.  
397 Health and Social Care Information Centre (hscic): England, 2017.
- 398 23. NHS Improvement. Reference costs 2016/17: highlights, analysis and introduction to the  
399 data. NHS Improvement: London, 2017.
- 400 24. StringDB database: <https://string-db.org/> accessed December 15<sup>th</sup>, 2019.
- 401 25. International Mouse Phenotyping Consortium portal:  
402 <https://www.mousephenotype.org/> accessed August 30<sup>th</sup>, 2019.
- 403 26. Mouse Genome Database: <http://www.informatics.jax.org/> accessed August 30<sup>th</sup>, 2019.
- 404

405

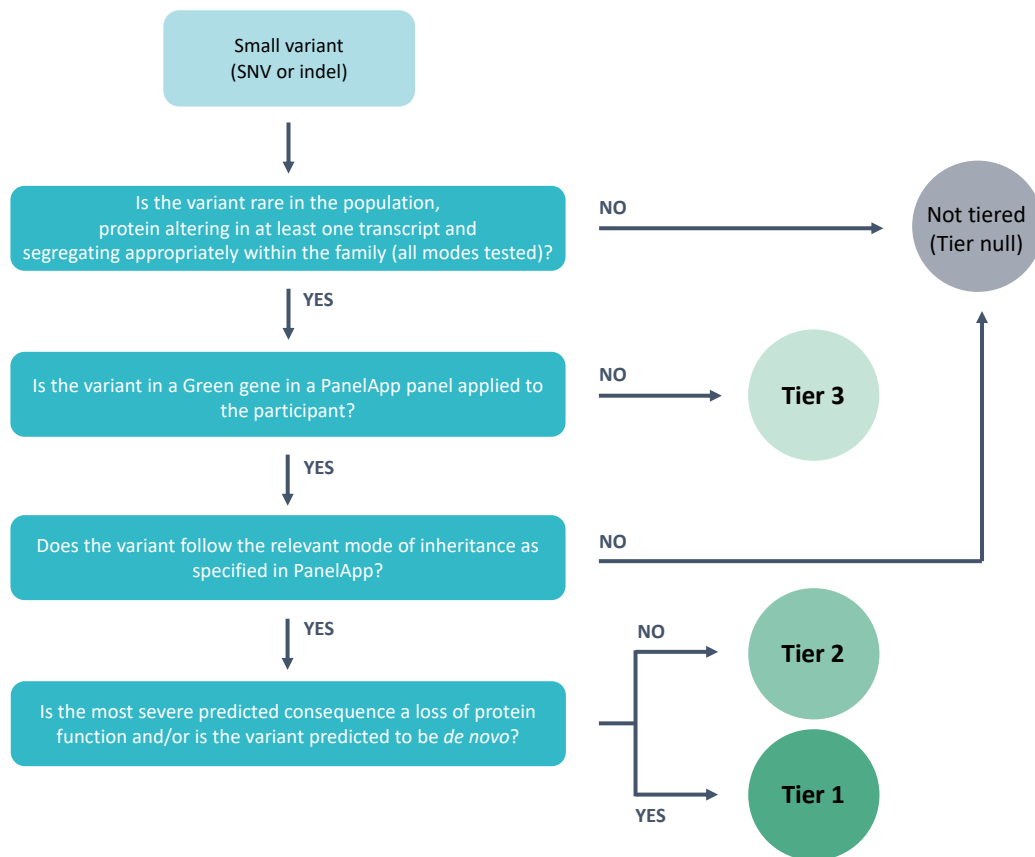

406

407

408

**Figure S1. Virtual panel-based variant filtering and prioritisation pipeline.**



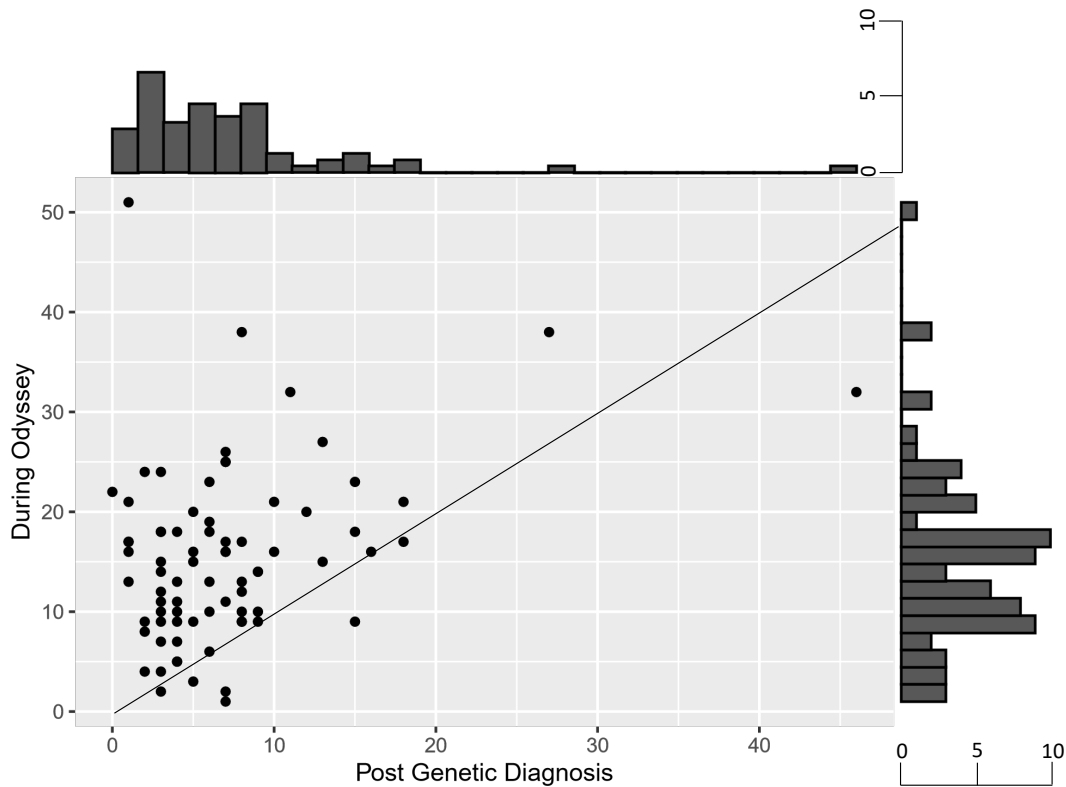

410

411 **Figure S2: Totals of distinct activities during diagnostic odyssey and post genetic diagnosis**  
 412 **periods.**

413 Each dot represents a patient in the group and the coordinates of the dot correspond to the  
 414 totals of their distinct clinical activity (main specialty of consultant seen in outpatients or  
 415 during hospital admission and diagnostic imaging modality) during the diagnostic odyssey and  
 416 the period after the genetic diagnosis. The marginal distributions on the right and above the  
 417 plot show the resulting distribution of distinct activities for all the young probands who  
 418 received a genetic diagnosis for the period following this milestone, and the period preceding  
 419 it, respectively. The clinical activities captured in a electronic health record are often of the  
 420 same type and may be repeated over time. Less variability in the type may indicate that the  
 421 patient is settled in a healthcare pathway as a result of a conclusive diagnosis.

422

423 **Table S1. Clinical activity during diagnostic odyssey and post genetic diagnosis.**  
 424 Medians, dispersion (IQR) and monthly averages are shown for total clinical activity as well as  
 425 subdivided by Admitted Patient Care (APC), Outpatient (OP) and Diagnostic Imaging Dataset  
 426 (DID). Data was collected on 172 diagnosed probands who were born during or after 2006 for  
 427 a median period of 75 months during their diagnostic odyssey and a median period of 18  
 428 months post diagnosis.  
 429  
 430

|              | During Diagnostic Odyssey |      |                  | Post Genetic Diagnosis Established |      |                  |
|--------------|---------------------------|------|------------------|------------------------------------|------|------------------|
|              | Median                    | IQR  | Median Per Month | Median                             | IQR  | Median Per Month |
| <b>Total</b> | 67.50                     | 77.5 | 0.99             | 17.75                              | 14.0 | 0.89             |
| <b>APC</b>   | 11.50                     | 6.0  | 0.08             | 1.25                               | 0.0  | 0.00             |
| <b>OP</b>    | 59.75                     | 61.0 | 0.73             | 13.00                              | 9.5  | 0.60             |
| <b>DID</b>   | 7.25                      | 5.0  | 0.06             | 2.00                               | 0.0  | 0.00             |

431  
 432  
 433

434 **Table S2. Distribution of secondary care activity of unaffected relatives group born during**  
435 **or after 2006: all activity, APC hospitalisations, outpatient appointments, accident and**  
436 **emergency visits, critical care attendances and diagnostic imaging events.**

437 Data was collected on 318 unaffected relatives from birth to the study cut-off date with a  
438 median period of 10 years (120 months).

439  
440

|              | <b>IQR</b> | <b>Median</b> |
|--------------|------------|---------------|
| <b>Total</b> | 32.00      | 18.0          |
| <b>APC</b>   | 4.00       | 3.0           |
| <b>OP</b>    | 22.00      | 11.0          |
| <b>AE</b>    | 6.00       | 4.0           |
| <b>CC</b>    | 1.25       | 2.5           |
| <b>DID</b>   | 5.00       | 3.0           |

441  
442

443 **Table S3: Overview of 100,000 Genomes Project Pilot cohort costs of hospital care in the emergency department, inpatients, outpatients**  
 444 **and critical care (intensive care) depicting costs for all participants, 2676 affected and 2146 unaffected people from 2183 families.**  
 445

| Statistic                                                   | Category of care           |                             |                                     |                                  |                                            |
|-------------------------------------------------------------|----------------------------|-----------------------------|-------------------------------------|----------------------------------|--------------------------------------------|
|                                                             | Critical care              | Emergency care <sup>1</sup> | Inpatient care <sup>2</sup>         | Outpatient care                  | All care                                   |
| <b>Number of episodes</b>                                   |                            |                             |                                     |                                  |                                            |
| All participants                                            | 347                        | 16,696                      | 43,714                              | 177,125                          | <b>237,882</b>                             |
| Affected                                                    | 303                        | 11,875                      | 34,143                              | 136,952                          | <b>183,273</b>                             |
| Unaffected                                                  | 44                         | 4,765                       | 9,446                               | 39,451                           | <b>53,706</b>                              |
| Not known                                                   | 0                          | 56                          | 125                                 | 722                              | <b>903</b>                                 |
| <b>Total cost</b>                                           |                            |                             |                                     |                                  |                                            |
| All participants                                            | £2,050,583                 | £2,530,399                  | £77,276,982                         | £26,243,354                      | <b>£108,101,318</b>                        |
| Affected                                                    | £1,811,555                 | £1,823,143                  | £62,525,278                         | £20,891,363                      | <b>£87,051,339</b>                         |
| Unaffected                                                  | £239,028                   | £700,259                    | £14,554,200                         | £5,254,317                       | <b>£20,747,803</b>                         |
| Not known                                                   | -                          | £6,997                      | £197,504                            | £97,674                          | <b>£302,176</b>                            |
| <b>Mean (median) cost per participant</b>                   |                            |                             |                                     |                                  |                                            |
| All participants                                            | £420 (£0)                  | £519 (£211)                 | £15,852 (£5,258)                    | £5,383 (£2,887)                  | <b>£22,175 (£9,231)</b>                    |
| Affected                                                    | £677 (£0)                  | £681 (£341)                 | £23,365 (£8,489)                    | £7,807 (£5,175)                  | <b>£32,530 (£15,310)</b>                   |
| Unaffected                                                  | £111 (£0)                  | £326 (£119)                 | £6,782 (£2,444)                     | £2,448 (£1,067)                  | <b>£9,668 (£4,285)</b>                     |
| Not known                                                   | £0 (£0)                    | £137 (£0)                   | £3,873 (£0)                         | £1,915 (£584)                    | <b>£5,925 (£1,078)</b>                     |
| <i>Mean difference, affected versus unaffected (95% CI)</i> | <i>£566 (£260 to £871)</i> | <i>£355 (£294 to £416)</i>  | <i>£16,583 (£13,526 to £19,641)</i> | <i>£5,359 (£4,866 to £5,851)</i> | <b><i>£22,862 (£19,457 to £26,268)</i></b> |

446

447

448  
449

**Table S4. Diagnostic yield by disease and family structure.**

| Disease area                     | Disease                                                         | Likely monogenic | Closed cases | Diagnostic yield % | Singletons | Diagnostic yield % (singletons) | Duos | Diagnostic yield % (duos) | Trios | Diagnostic yield % (trios) | Quads | Diagnostic yield % (quads) | Larger fams | Diagnostic yield % (larger fams) |
|----------------------------------|-----------------------------------------------------------------|------------------|--------------|--------------------|------------|---------------------------------|------|---------------------------|-------|----------------------------|-------|----------------------------|-------------|----------------------------------|
| Tumour syndromes                 | Multiple bowel polyps                                           | N                | 134          | 3.0                | 123        | 2.4                             | 4    | 0                         | 7     | 14.3                       | 0     | NA                         | 0           | NA                               |
| Neurology and neurodevelopmental | Intellectual disability                                         | Y                | 132          | 40.1               | 12         | 25                              | 24   | 41.7                      | 82    | 45.1                       | 11    | 27.3                       | 3           | 33.3                             |
| Ophthalmological                 | Rod-cone dystrophy                                              | Y                | 115          | 47.8               | 23         | 34.8                            | 18   | 50                        | 67    | 55.2                       | 6     | 16.7                       | 1           | 0                                |
| Neurology and neurodevelopmental | Hereditary ataxia                                               | Y                | 120          | 28.5               | 62         | 21.0                            | 19   | 36.9                      | 34    | 32.4                       | 4     | 50                         | 1           | 0                                |
| Neurology and neurodevelopmental | Charcot-Marie-Tooth disease                                     | Y                | 77           | 35.1               | 42         | 33.3                            | 14   | 42.8                      | 18    | 33.3                       | 3     | 33.3                       | 0           | NA                               |
| Metabolic                        | Mitochondrial disorders                                         | Y                | 76           | 40.2               | 23         | 21.7                            | 7    | 28.6                      | 39    | 50.4                       | 6     | 50                         | 1           | 100                              |
| Neurology and neurodevelopmental | Hereditary spastic paraplegia                                   | Y                | 74           | 33.8               | 34         | 20.6                            | 11   | 63.6                      | 24    | 33.3                       | 1     | 100                        | 4           | 50                               |
| Hearing and ear                  | Congenital hearing impairment (profound/severe)                 | Y                | 54           | 46.3               | 12         | 16.7                            | 8    | 62.5                      | 28    | 59.3                       | 5     | 40                         | 1           | 0                                |
| Renal and urinary tract          | Renal tract calcification (or Nephrolithiasis/nephrocalcinosis) | N                | 46           | 4.3                | 37         | 5.4                             | 4    | 0                         | 4     | 0                          | 0     | NA                         | 1           | 0                                |
| Endocrine                        | Kallmann syndrome                                               | N                | 43           | 20.9               | 36         | 19.4                            | 6    | 33.3                      | 1     | 0                          | 0     | NA                         | 0           | NA                               |
| Renal and urinary tract          | CAKUT                                                           | N                | 43           | 7.0                | 27         | 7.4                             | 6    | 0                         | 7     | 14.3                       | 2     | 0                          | 0           | NA                               |
| Tumour syndromes                 | Familial colon cancer                                           | N                | 37           | 5.4                | 33         | 6.1                             | 2    | 0                         | 2     | 0                          | 0     | NA                         | 0           | NA                               |
| Tumour syndromes                 | Multiple endocrine tumours                                      | N                | 36           | 2.8                | 29         | 3.5                             | 4    | 0                         | 3     | 0                          | 0     | NA                         | 0           | NA                               |
| Ciliopathies                     | Non-CF bronchiectasis                                           | N                | 38           | 5.3                | 23         | 4.4                             | 7    | 14.3                      | 7     | 0                          | 1     | 0                          | 0           | NA                               |
| Ophthalmological                 | Inherited optic neuropathies                                    | Y                | 33           | 33.3               | 19         | 36.8                            | 8    | 37.5                      | 6     | 16.7                       | 0     | NA                         | 0           | NA                               |
| Ophthalmological                 | Cone Dysfunction Syndrome                                       | Y                | 33           | 39.8               | 5          | 40                              | 8    | 25                        | 22    | 45.4                       | 0     | NA                         | 0           | NA                               |
| Cardiovascular                   | Familial Thoracic Aortic Aneurysm Disease                       | N                | 29           | 10.3               | 13         | 15.4                            | 9    | 11.1                      | 4     | 0                          | 2     | 0                          | 1           | 0                                |

|                                                 |                                                                   |   |    |      |    |      |   |      |    |      |   |      |   |     |
|-------------------------------------------------|-------------------------------------------------------------------|---|----|------|----|------|---|------|----|------|---|------|---|-----|
| Renal and urinary tract                         | Cystic kidney disease                                             | Y | 27 | 22.2 | 23 | 26.1 | 2 | 0    | 2  | 0    | 0 | NA   | 0 | NA  |
| Rheumatological                                 | Ehlers-Danlos syndrome type 3                                     | N | 26 | 11.5 | 11 | 0    | 4 | 0    | 7  | 28.6 | 3 | 33.3 | 1 | 0   |
| Tumour syndromes                                | Familial breast cancer                                            | N | 26 | 3.8  | 21 | 4.8  | 4 | 0    | 1  | 0    | 0 | NA   | 0 | NA  |
| Tumour syndromes                                | Neuro-endocrine Tumours- PCC and PGL                              | N | 29 | 6.9  | 16 | 12.5 | 9 | 0    | 4  | 0    | 0 | NA   | 0 | NA  |
| Dermatological                                  | Severe multi-system atopic disease with high IgE                  | N | 24 | 4.2  | 5  | 0    | 4 | 0    | 14 | 7.1  | 1 | 0    | 0 | NA  |
| Neurology and neurodevelopmental                | Congenital myopathy                                               | Y | 25 | 16.7 | 9  | 0    | 4 | 25   | 9  | 33.3 | 2 | 0    | 1 | 0   |
| Ophthalmological                                | Posterior segment abnormalities                                   | Y | 29 | 55.2 | 5  | 40   | 9 | 33.3 | 11 | 81.2 | 3 | 33.3 | 1 | 100 |
| Cardiovascular                                  | Dilated Cardiomyopathy (DCM)                                      | N | 25 | 24.0 | 12 | 16.7 | 7 | 42.3 | 9  | 11.1 | 1 | 0    | 0 | NA  |
| Ophthalmological                                | Cataracts                                                         | Y | 23 | 47.8 | 13 | 69.2 | 3 | 0    | 6  | 33.3 | 1 | 0    | 0 | NA  |
| Neurology and neurodevelopmental                | Early onset dystonia                                              | Y | 30 | 23.3 | 6  | 0    | 4 | 25   | 17 | 17.6 | 1 | 100  | 0 | NA  |
| Renal and urinary tract                         | Unexplained kidney failure in young people                        | N | 20 | 30   | 16 | 12.5 | 2 | 100  | 2  | 100  | 0 | NA   | 0 | NA  |
| Ophthalmological                                | Inherited macular dystrophy                                       | Y | 19 | 47.4 | 3  | 0    | 2 | 100  | 13 | 53.8 | 1 | 0    | 0 | NA  |
| Metabolic                                       | Ketotic hypoglycaemia                                             | N | 18 | 16.7 | 1  | 0    | 4 | 25   | 12 | 16.7 | 1 | 0    | 0 | NA  |
| Neurology and neurodevelopmental                | Paediatric motor neuronopathies                                   | Y | 24 | 33.3 | 3  | 0    | 4 | 50   | 15 | 26.7 | 2 | 100  | 0 | NA  |
| Ophthalmological                                | Leber Congenital Amaurosis / Early-Onset Severe Retinal Dystrophy | Y | 16 | 56.2 | 1  | 100  | 0 | NA   | 15 | 53.3 | 0 | NA   | 0 | NA  |
| Skeletal                                        | Osteogenesis Imperfecta                                           | Y | 20 | 45   | 4  | 50   | 6 | 33.3 | 5  | 40   | 4 | 75   | 1 | 0   |
| Rheumatological                                 | Juvenile dermatomyositis                                          | N | 15 | 6.7  | 1  | 100  | 2 | 0    | 12 | 0    | 0 | NA   | 0 | NA  |
| Skeletal                                        | Unexplained skeletal dysplasia                                    | Y | 14 | 7.1  | 2  | 0    | 1 | 0    | 8  | 12.5 | 3 | 0    | 0 | NA  |
| Cardiovascular                                  | Hypertrophic Cardiomyopathy                                       | N | 18 | 44.4 | 12 | 25   | 1 | 0    | 5  | 100  | 0 | NA   | 0 | NA  |
| Gastroenterological                             | Infantile enterocolitis & monogenic inflammatory bowel disease    | N | 21 | 4.8  | 0  | NA   | 1 | 0    | 14 | 7.1  | 5 | 0    | 1 | 0   |
| Dysmorphic and congenital abnormality syndromes | VACTERL-like phenotypes                                           | N | 14 | 0    | 10 | 0    | 2 | 0    | 2  | 0    | 0 | NA   | 0 | NA  |
| Ciliopathies                                    | Bardet-Biedl Syndrome                                             | Y | 14 | 57.1 | 1  | 0    | 6 | 66.7 | 6  | 66.7 | 1 | 0    | 0 | NA  |

|                                  |                                                             |   |    |      |    |      |   |      |    |      |   |     |   |     |
|----------------------------------|-------------------------------------------------------------|---|----|------|----|------|---|------|----|------|---|-----|---|-----|
| Neurology and neurodevelopmental | Distal myopathies                                           | Y | 17 | 17.7 | 13 | 15.4 | 1 | 0    | 2  | 50   | 0 | NA  | 1 | 0   |
| Ciliopathies                     | Primary ciliary disorders                                   | Y | 13 | 23.1 | 10 | 20   | 3 | 33.3 | 0  | NA   | 0 | NA  | 0 | NA  |
| Skeletal                         | Stickler syndrome                                           | Y | 13 | 30.8 | 8  | 12.5 | 1 | 0    | 3  | 100  | 1 | 0   | 0 | NA  |
| Neurology and neurodevelopmental | Epileptic encephalopathy                                    | Y | 16 | 43.8 | 0  | NA   | 3 | 100  | 11 | 36.3 | 2 | 0   | 0 | NA  |
| Neurology and neurodevelopmental | Classical tuberous sclerosis                                | Y | 11 | 9.1  | 9  | 0    | 0 | NA   | 2  | 50   | 0 | NA  | 0 | NA  |
| Endocrine                        | IUGR and IGF abnormalities                                  | Y | 11 | 0    | 1  | 0    | 3 | 0    | 5  | 0    | 2 | 0   | 0 | NA  |
| Neurology and neurodevelopmental | Complex Parkinsonism (includes pallido-pyramidal syndromes) | N | 12 | 16.7 | 8  | 12.5 | 2 | 0    | 2  | 50   | 0 | NA  | 0 | NA  |
| Renal and urinary tract          | Proteinuric renal disease                                   | N | 11 | 45.5 | 7  | 42.9 | 1 | 100  | 3  | 33.3 | 0 | NA  | 0 | NA  |
| Cardiovascular                   | Brugada syndrome                                            | N | 17 | 5.9  | 7  | 0    | 3 | 0    | 4  | 25   | 1 | 0   | 0 | NA  |
| Renal and urinary tract          | Familial haematuria                                         | N | 11 | 18.1 | 8  | 0    | 1 | 100  | 2  | 50   | 0 | NA  | 0 | NA  |
| Cardiovascular                   | Long QT syndrome                                            | N | 13 | 23.1 | 7  | 28.6 | 1 | 0    | 4  | 0    | 0 | NA  | 1 | 100 |
| Neurology and neurodevelopmental | Skeletal Muscle Channelopathies                             | N | 13 | 7.7  | 6  | 16.7 | 2 | 0    | 5  | 0    | 0 | NA  | 0 | NA  |
| Neurology and neurodevelopmental | Congenital muscular dystrophy                               | Y | 12 | 33.3 | 5  | 60   | 1 | 0    | 5  | 0    | 1 | 100 | 0 | NA  |
| Endocrine                        | Familial or syndromic hypoparathyroidism                    | Y | 9  | 44.4 | 6  | 50   | 2 | 50   | 1  | 0    | 0 | NA  | 0 | NA  |
|                                  | Ocular and oculocutaneous albinism                          | Y | 9  | 55.6 | 1  | 100  | 1 | 0    | 7  | 57.1 | 0 | NA  | 0 | NA  |
| Gastroenterological              | Infantile pseudo-obstruction                                | N | 9  | 0    | 0  | NA   | 0 | NA   | 6  | 0    | 3 | 0   | 0 | NA  |
| Hearing and ear                  | Bilateral microtia                                          | Y | 9  | 22.2 | 1  | 0    | 1 | 100  | 5  | 20   | 1 | 0   | 1 | 0   |
| Endocrine                        | Congenital adrenal hypoplasia                               | Y | 10 | 33.3 | 3  | 33.3 | 2 | 100  | 3  | 0    | 1 | 0   | 1 | 0   |
| Neurology and neurodevelopmental | Inherited white matter disorders                            | Y | 11 | 18.2 | 2  | 0    | 1 | 0    | 6  | 17.6 | 2 | 50  | 0 | NA  |
| Neurology and neurodevelopmental | Limb girdle muscular dystrophy                              | Y | 8  | 25   | 5  | 40   | 1 | 0    | 1  | 0    | 1 | 0   | 0 | NA  |
| Ophthalmological                 | Rod Dysfunction Syndrome                                    | Y | 8  | 50   | 2  | 50   | 1 | 100  | 4  | 25   | 1 | 100 | 0 | NA  |
| Neurology and neurodevelopmental | Brain channelopathy                                         | N | 8  | 12.5 | 4  | 0    | 0 | NA   | 4  | 25   | 0 | NA  | 0 | NA  |
| Ophthalmological                 | Corneal abnormalities                                       | N | 9  | 11.1 | 1  | 0    | 3 | 0    | 5  | 20   | 0 | NA  | 0 | NA  |

|                                                 |                                                                                |   |    |      |   |      |   |     |   |      |   |     |   |     |
|-------------------------------------------------|--------------------------------------------------------------------------------|---|----|------|---|------|---|-----|---|------|---|-----|---|-----|
| Neurology and neurodevelopmental                | Early onset and familial Parkinson's Disease                                   | N | 10 | 20   | 3 | 0    | 2 | 50  | 5 | 20   | 0 | NA  | 0 | NA  |
| Cardiovascular                                  | Familial non-syndromic congenital heart disease                                | N | 8  | 12.5 | 1 | 0    | 2 | 0   | 3 | 0    | 1 | 100 | 1 | 0   |
|                                                 | Agranulocytosis                                                                | Y | 7  | 14.3 | 3 | 0    | 2 | 50  | 2 | 0    | 0 | NA  | 0 | NA  |
| Neurology and neurodevelopmental                | Familial Genetic Generalised Epilepsies                                        | N | 7  | 0    | 3 | 0    | 2 | 0   | 1 | 0    | 1 | 0   | 0 | NA  |
| Neurology and neurodevelopmental                | Kleine-Levin syndrome                                                          | N | 7  | 0    | 0 | NA   | 1 | 0   | 6 | 0    | 0 | NA  | 0 | NA  |
| Renal and urinary tract                         | Renal tubular acidosis                                                         | N | 7  | 14.3 | 3 | 33.3 | 1 | 0   | 2 | 0    | 1 | 0   | 0 | NA  |
|                                                 | A- or hypogammaglobulinaemia                                                   | Y | 6  | 33.3 | 0 | NA   | 2 | 0   | 3 | 33.3 | 0 | NA  | 1 | 100 |
| Skeletal                                        | Craniosynostosis syndromes phenotypes                                          | Y | 7  | 28.6 | 1 | 0    | 1 | 100 | 5 | 20   | 0 | NA  | 0 | NA  |
| Ophthalmological                                | Familial exudative retinopathy                                                 | Y | 6  | 33.3 | 0 | NA   | 2 | 0   | 4 | 50   | 0 | NA  | 0 | NA  |
| Dysmorphic and congenital abnormality syndromes | RASopathies                                                                    | Y | 6  | 16.7 | 1 | 0    | 0 | NA  | 4 | 0    | 1 | 100 | 0 | NA  |
| Cardiovascular                                  | Arrhythmogenic Right Ventricular Cardiomyopathy                                | N | 13 | 23.1 | 5 | 20   | 4 | NA  | 3 | 33.3 | 1 | 100 | 0 | NA  |
| Tumour syndromes                                | Familial Tumours                                                               | N | 6  | 66.7 | 4 | 75   | 2 | 50  | 0 | NA   | 0 | NA  | 0 | NA  |
|                                                 | Syndromes of the central & peripheral Nervous system                           |   |    |      |   |      |   |     |   |      |   |     |   |     |
| Tumour syndromes                                | Multiple Tumours                                                               | N | 6  | 16.7 | 4 | 25   | 1 | 0   | 1 | 0    | 0 | NA  | 0 | NA  |
| Ophthalmological                                | Anophthalmia/microphthalmia                                                    | Y | 5  | 40   | 0 | NA   | 1 | 100 | 4 | 25   | 0 | NA  | 0 | NA  |
| Ophthalmological                                | Ocular coloboma                                                                | Y | 5  | 20   | 0 | NA   | 0 | NA  | 5 | 20   | 0 | NA  | 0 | NA  |
| Ciliopathies                                    | Rare multisystem ciliopathy disorders                                          | Y | 5  | 40   | 0 | NA   | 1 | 100 | 3 | 0    | 1 | 100 | 0 | NA  |
| Neurology and neurodevelopmental                | Amyotrophic lateral sclerosis/motor neuron disease                             | N | 5  | 20   | 2 | 0    | 1 | 100 | 2 | 0    | 0 | NA  | 0 | NA  |
| Neurology and neurodevelopmental                | Early onset dementia (encompassing fronto-temporal dementia and prion disease) | N | 5  | 20   | 5 | 20   | 0 | NA  | 0 | NA   | 0 | NA  | 0 | NA  |
| Endocrine                                       | Familial diabetes                                                              | N | 5  | 0    | 5 | 0    | 0 | NA  | 0 | NA   | 0 | NA  | 0 | NA  |



|                                  |                                                       |   |   |      |   |      |   |     |   |      |   |    |   |     |
|----------------------------------|-------------------------------------------------------|---|---|------|---|------|---|-----|---|------|---|----|---|-----|
| Cardiovascular                   | Left Ventricular Noncompaction Cardiomyopathy         | N | 5 | 20   | 4 | 25   | 0 | NA  | 1 | 0    | 0 | NA | 0 | NA  |
| Neurology and neurodevelopmental | Moyamoya disease                                      | N | 5 | 0    | 0 | NA   | 0 | NA  | 4 | 0    | 1 | 0  | 0 | NA  |
| Ophthalmological                 | Glaucoma (developmental)                              | Y | 4 | 50   | 0 | NA   | 1 | 100 | 3 | 33.3 | 0 | NA | 0 | NA  |
| Renal and urinary tract          | Atypical haemolytic uraemic syndrome                  | N | 4 | 25   | 0 | NA   | 1 | 100 | 3 | 0    | 0 | NA | 0 | NA  |
| Cardiovascular                   | Catecholaminergic Polymorphic Ventricular Tachycardia | N | 4 | 0    | 1 | 0    | 0 | NA  | 3 | 0    | 0 | NA | 0 | NA  |
| Dermatological                   | Erythropoietic protoporphyria, mild variant           | N | 4 | 25   | 2 | 50   | 0 | NA  | 2 | 0    | 0 | NA | 0 | NA  |
| Renal and urinary tract          | Extreme early-onset hypertension                      | N | 4 | 0    | 4 | 0    | 0 | NA  | 0 | NA   | 0 | NA | 0 | NA  |
| Tumour syndromes                 | Genodermatoses with malignancies                      | N | 4 | 25   | 3 | 33.3 | 1 | 0   | 0 | NA   | 0 | NA | 0 | NA  |
| Dermatological                   | Hydroa vacciniforme                                   | N | 4 | 0    | 1 | 0    | 0 | NA  | 3 | 0    | 0 | NA | 0 | NA  |
| Neurology and neurodevelopmental | Arthrogyrosis                                         | Y | 4 | 0    | 0 | NA   | 2 | 0   | 1 | NA   | 1 | 0  | 0 | NA  |
| Haematological                   | Congenital anaemias                                   | Y | 5 | 20   | 0 | NA   | 1 | 0   | 2 | 0    | 2 | 50 | 0 | NA  |
| Ophthalmological                 | Developmental macular and foveal dystrophy            | Y | 3 | 0    | 0 | NA   | 0 | NA  | 3 | 0    | 0 | NA | 0 | NA  |
| Endocrine                        | Disorders of sex development                          | Y | 3 | 66.7 | 2 | 50   | 0 | NA  | 1 | 100  | 0 | NA | 0 | NA  |
| Metabolic                        | Mucopolysaccharidosis, Gaucher, Fabry                 | Y | 3 | 33.3 | 1 | 0    | 0 | NA  | 1 | 100  | 1 | 0  | 0 | NA  |
| Metabolic                        | Undiagnosed metabolic disorders                       | Y | 3 | 66.7 | 1 | 0    | 0 | NA  | 1 | 100  | 0 | NA | 1 | 100 |
| Neurology and neurodevelopmental | Cerebrovascular disorders                             | N | 4 | 0    | 0 | NA   | 2 | 0   | 1 | 0    | 1 | 0  | 0 | NA  |
|                                  | Familial dysautonomia                                 | N | 3 | 0    | 0 | NA   | 1 | 0   | 2 | 0    | 0 | NA | 0 | NA  |
|                                  | Multiple lipomas                                      | N | 3 | 0    | 2 | 0    | 1 | 0   | 0 | NA   | 0 | NA | 0 | NA  |
|                                  | Regional overgrowth disorders                         | N | 3 | 0    | 2 | 0    | 1 | 0   | 0 | NA   | 0 | NA | 0 | NA  |
| Hearing and ear                  | Autosomal dominant deafness                           | Y | 2 | 50   | 0 | NA   | 1 | 0   | 1 | 100  | 0 | NA | 0 | NA  |
| Dermatological                   | Autosomal recessive congenital ichthyosis             | Y | 2 | 0    | 0 | NA   | 0 | NA  | 1 | 0    | 1 | 0  | 0 | NA  |
| Growth                           | Beckwith-Wiedemann syndrome (BWS) and other           | Y | 2 | 50   | 1 | 100  | 0 | NA  | 1 | 0    | 0 | NA | 0 | NA  |

| congenital overgrowth disorders  |                                                    |   |   |      |   |    |   |     |   |     |   |    |   |    |
|----------------------------------|----------------------------------------------------|---|---|------|---|----|---|-----|---|-----|---|----|---|----|
| Respiratory                      | Hereditary haemorrhagic telangiectasia             | Y | 2 | 0    | 1 | 0  | 0 | NA  | 1 | 0   | 0 | NA | 0 | NA |
| Ophthalmological                 | Infantile nystagmus                                | Y | 2 | 50   | 0 | NA | 1 | 100 | 1 | 0   | 0 | NA | 0 | NA |
| Neurology and neurodevelopmental | Rhabdomyolysis and metabolic muscle disorders      | Y | 2 | 0    | 0 | NA | 1 | 0   | 1 | 0   | 0 | NA | 0 | NA |
|                                  | SCID                                               | Y | 2 | 50   | 0 | NA | 0 | NA  | 2 | 50  | 0 | NA | 0 | NA |
| Skeletal                         | Thoracic dystrophies                               | Y | 2 | 0    | 0 | NA | 0 | NA  | 2 | 0   | 0 | NA | 0 | NA |
| Endocrine                        | Congenital hypothyroidism or thyroid agenesis      | N | 2 | 0    | 2 | 0  | 0 | NA  | 0 | NA  | 0 | NA | 0 | NA |
| Dermatological                   | Ectodermal dysplasia without a known gene mutation | N | 2 | 50   | 0 | NA | 0 | NA  | 2 | 50  | 0 | NA | 0 | NA |
| Rheumatological                  | Ehlers-Danlos syndromes                            | N | 6 | 16.7 | 2 | 50 | 2 | 0   | 2 | 0   | 0 | NA | 0 | NA |
| Cardiovascular                   | Fallo's tetralogy                                  | N | 2 | 0    | 0 | NA | 0 | NA  | 2 | 0   | 0 | NA | 0 | NA |
| Cardiovascular                   | Familial cerebral small vessel disease             | N | 2 | 50   | 2 | 50 | 0 | NA  | 0 | NA  | 0 | NA | 0 | NA |
| Neurology and neurodevelopmental | Familial Focal Epilepsies                          | N | 2 | 0    | 0 | NA | 1 | 0   | 1 | 0   | 0 | NA | 0 | NA |
| Endocrine                        | Hyperinsulinism                                    | N | 2 | 50   | 0 | NA | 1 | 100 | 1 | 0   | 0 | NA | 0 | NA |
| Haematological and immunological | Monogenic thrombophilia                            | N | 2 | 0    | 1 | 0  | 1 | 0   | 0 | NA  | 0 | NA | 0 | NA |
| Tumour syndromes                 | Rare tumour predisposition syndromes               | N | 2 | 0    | 2 | 0  | 0 | NA  | 0 | NA  | 0 | NA | 0 | NA |
| Cardiovascular                   | Dilated Cardiomyopathy and conduction defects      |   | 2 | 50   | 2 | 50 | 0 | NA  | 0 | NA  | 0 | NA | 0 | NA |
| Neurology and neurodevelopmental | Cerebellar hypoplasia                              | Y | 1 | 100  | 0 | NA | 0 | NA  | 1 | 100 | 0 | NA | 0 | NA |
| Skeletal                         | Choanal atresia                                    | Y | 1 | 0    | 0 | NA | 0 | NA  | 0 | NA  | 1 | 0  | 0 | NA |
| Growth                           | Classical Beckwith-Wiedemann syndrome              | Y | 1 | 0    | 1 | 0  | 0 | NA  | 0 | NA  | 0 | NA | 0 | NA |
|                                  | Combined B and T cell defect                       | Y | 1 | 0    | 0 | NA | 1 | 0   | 0 | NA  | 0 | NA | 0 | NA |
| Neurology and neurodevelopmental | Congenital myaesthesia                             | Y | 1 | 0    | 0 | NA | 1 | 0   | 0 | NA  | 0 | NA | 0 | NA |
| Hearing and ear                  | Ear malformations                                  | Y | 1 | 0    | 0 | NA | 0 | NA  | 1 | 0   | 0 | NA | 0 | NA |
| Haematological                   | Early onset pancytopenia and red cell disorders    | Y | 1 | 0    | 0 | NA | 0 | NA  | 1 | 0   | 0 | NA | 0 | NA |

|                                  |                                                                                |   |   |      |   |     |   |    |   |    |   |    |   |    |
|----------------------------------|--------------------------------------------------------------------------------|---|---|------|---|-----|---|----|---|----|---|----|---|----|
| Hearing and ear                  | Familial hemifacial microsomia                                                 | Y | 1 | 0    | 0 | NA  | 1 | 0  | 0 | NA | 0 | NA | 0 | NA |
| Cardiovascular                   | Familial hypercholesterolaemia                                                 | Y | 1 | 0    | 1 | 0   | 0 | NA | 0 | NA | 0 | NA | 0 | NA |
| Neurology and neurodevelopmental | Holoprosencephaly                                                              | Y | 1 | 0    | 1 | 0   | 0 | NA | 0 | NA | 0 | NA | 0 | NA |
| Metabolic                        | Hyperammonaemia                                                                | Y | 1 | 0    | 0 | NA  | 0 | NA | 0 | NA | 1 | 0  | 0 | NA |
| Haematological and immunological | Inherited bleeding disorders                                                   | Y | 1 | 0    | 0 | NA  | 1 | 0  | 0 | NA | 0 | NA | 0 | NA |
| Neurology and neurodevelopmental | Intracerebral calcification disorders                                          | Y | 1 | 0    | 0 | NA  | 1 | 0  | 0 | NA | 0 | NA | 0 | NA |
| Rheumatological                  | Kyphoscoliotic Ehlers-Danlos syndrome                                          | Y | 1 | 0    | 0 | NA  | 0 | NA | 1 | 0  | 0 | NA | 0 | NA |
| Endocrine                        | Significant early-onset obesity +/- other endocrine features and short stature | Y | 1 | 0    | 0 | NA  | 0 | NA | 1 | 0  | 0 | NA | 0 | NA |
|                                  | Balanced translocations with an unusual phenotype                              | N | 3 | 33.3 | 1 | 0   | 0 | NA | 2 | 50 | 0 | NA | 0 | NA |
| Neurology and neurodevelopmental | Cerebral arteriovenous malformations                                           | N | 1 | 0    | 0 | NA  | 1 | 0  | 0 | NA | 0 | NA | 0 | NA |
| Neurology and neurodevelopmental | Cerebral vascular malformations                                                | N | 1 | 100  | 1 | 100 | 0 | NA | 0 | NA | 0 | NA | 0 | NA |
|                                  | Currarino triad                                                                | N | 1 | 0    | 0 | NA  | 1 | 0  | 0 | NA | 0 | NA | 0 | NA |
|                                  | Familial Neural Tube Defects                                                   | N | 1 | 0    | 0 | NA  | 0 | NA | 1 | 0  | 0 | NA | 0 | NA |
| Tumour syndromes                 | Familial prostate cancer                                                       | N | 1 | 100  | 1 | 100 | 0 | NA | 0 | NA | 0 | NA | 0 | NA |
| Haematological and immunological | Inherited platelet disorders                                                   | N | 1 | 0    | 0 | NA  | 1 | 0  | 0 | NA | 0 | NA | 0 | NA |
| Dermatological                   | Palmoplantar keratoderma and erythrokeratodermas                               | N | 1 | 0    | 0 | NA  | 1 | 0  | 0 | NA | 0 | NA | 0 | NA |
| Neurology and neurodevelopmental | Parkinson Disease and Complex Parkinsonism                                     | N | 1 | 0    | 1 | 0   | 0 | NA | 0 | NA | 0 | NA | 0 | NA |
| Rheumatological                  | Periodic fever syndromes                                                       | N | 1 | 0    | 0 | NA  | 0 | NA | 1 | 0  | 0 | NA | 0 | NA |
|                                  | Pityriasis rubra pilaris                                                       | N | 1 | 0    | 1 | 0   | 0 | NA | 0 | NA | 0 | NA | 0 | NA |
| Endocrine                        | Resistance to thyroid hormone                                                  | N | 1 | 0    | 1 | 0   | 0 | NA | 0 | NA | 0 | NA | 0 | NA |
| Skeletal                         | Multiple Epiphyseal Dysplasia                                                  |   | 1 | 0    | 0 | NA  | 1 | 0  | 0 | NA | 0 | NA | 0 | NA |
| Neurology and neurodevelopmental | Parkinson Disease and Complex Parkinsonism                                     |   | 1 | 0    | 1 | 0   | 0 | NA | 0 | NA | 0 | NA | 0 | NA |

|                 |                                                                                |   |   |   |    |   |    |   |    |   |    |   |    |
|-----------------|--------------------------------------------------------------------------------|---|---|---|----|---|----|---|----|---|----|---|----|
| Rheumatological | Periodic fever syndromes                                                       | 1 | 0 | 0 | NA | 0 | NA | 1 | 0  | 0 | NA | 0 | NA |
| Endocrine       | Resistance to thyroid hormone                                                  | 1 | 0 | 1 | 0  | 0 | NA | 0 | NA | 0 | NA | 0 | NA |
| Endocrine       | Significant early-onset obesity +/- other endocrine features and short stature | 1 | 0 | 0 | NA | 0 | NA | 1 | 0  | 0 | NA | 0 | NA |
| Growth          | Silver Russell syndrome                                                        | 1 | 0 | 0 | NA | 0 | NA | 1 | 0  | 0 | NA | 0 | NA |

450

451

452 **Table S5. Percentage Diagnostic uplift by detailed prior genetic testing type.**

| <b>Testing</b>       | <b>Number of probands</b> | <b>% Diagnostic uplift</b> |
|----------------------|---------------------------|----------------------------|
| Single gene(s)       | 393                       | 29                         |
| Single gene(s) mtDNA | 21                        | 42.9                       |
| Single gene(s) STR   | 72                        | 22.2                       |
| mtDNA genome         | 25                        | 36                         |
| Karyotyping          | 29                        | 44.8                       |
| Fragile X            | 27                        | 51.9                       |
| DNA methylation      | 12                        | 50                         |
| ArrayCGH             | 10                        | 40                         |
| Arrays               | 61                        | 42.6                       |
| NGS panels           | 193                       | 30.1                       |
| WES                  | 16                        | 37.5                       |

453

454

455

456

457

458

459 **Table S6. Percentage Diagnostic uplift by disease category and most extensive type of prior genetic testing**

|                                                        | Number of probands | % Diagnostic uplift |
|--------------------------------------------------------|--------------------|---------------------|
| <b>Cardiovascular disorders</b>                        | 64                 | 25                  |
| None                                                   | 29                 | 20.7                |
| Panel                                                  | 18                 | 33.3                |
| Targeted                                               | 17                 | 23.5                |
| <b>Ciliopathies</b>                                    | 14                 | 42.9                |
| Chromosomal                                            | 2                  | 100                 |
| None                                                   | 3                  | 100                 |
| Panel                                                  | 9                  | 11.1                |
| <b>Dermatological disorders</b>                        | 10                 | 10                  |
| None                                                   | 7                  | 0                   |
| Targeted                                               | 3                  | 33.3                |
| <b>Dysmorphic and congenital abnormality syndromes</b> | 5                  | 0                   |
| Chromosomal                                            | 1                  | 0                   |
| Panel                                                  | 2                  | 0                   |
| Targeted                                               | 2                  | 0                   |
| <b>Endocrine disorders</b>                             | 35                 | 28.6                |
| Chromosomal                                            | 2                  | 50                  |
| None                                                   | 27                 | 22.2                |
| Targeted                                               | 6                  | 50                  |
| <b>Gastroenterological disorders</b>                   | 28                 | 3.6                 |
| Exome                                                  | 1                  | 0                   |
| None                                                   | 21                 | 0                   |
| Panel                                                  | 4                  | 0                   |
| Targeted                                               | 2                  | 50                  |
| <b>Growth disorders</b>                                | 2                  | 0                   |

|                                                   |     |      |
|---------------------------------------------------|-----|------|
| Targeted                                          | 2   | 0    |
| <b>Haematological disorders</b>                   | 1   | 0    |
| Targeted                                          | 1   | 0    |
| <b>Hearing and ear disorders</b>                  | 48  | 52.1 |
| Chromosomal                                       | 4   | 25   |
| None                                              | 28  | 53.6 |
| Panel                                             | 7   | 71.4 |
| Targeted                                          | 9   | 44.4 |
| <b>Metabolic disorders</b>                        | 80  | 41.3 |
| Chromosomal                                       | 6   | 100  |
| Exome                                             | 3   | 66.7 |
| None                                              | 23  | 26.1 |
| Panel                                             | 16  | 37.5 |
| Targeted                                          | 32  | 40.6 |
| <b>Neurology and neurodevelopmental disorders</b> | 416 | 29.6 |
| Chromosomal                                       | 26  | 42.3 |
| Exome                                             | 5   | 20   |
| None                                              | 147 | 29.3 |
| Panel                                             | 60  | 28.3 |
| Targeted                                          | 178 | 28.7 |
| <b>Ophthalmological disorders</b>                 | 287 | 47   |
| Chromosomal                                       | 4   | 50   |
| Exome                                             | 5   | 40   |
| None                                              | 161 | 53.4 |
| Panel                                             | 60  | 38.3 |
| Targeted                                          | 57  | 38.6 |
| <b>Renal and urinary tract disorders</b>          | 45  | 8.9  |
| Chromosomal                                       | 4   | 25   |

|                                  |             |      |      |
|----------------------------------|-------------|------|------|
|                                  | None        | 29   | 3.4  |
|                                  | Panel       | 2    | 50   |
|                                  | Targeted    | 10   | 10   |
| <b>Respiratory disorders</b>     |             | 1    | 0    |
|                                  | None        | 1    | 0    |
| <b>Rheumatological disorders</b> |             | 25   | 4    |
|                                  | Chromosomal | 2    | 0    |
|                                  | None        | 22   | 4.5  |
|                                  | Targeted    | 1    | 0    |
| <b>Skeletal disorders</b>        |             | 21   | 14.3 |
|                                  | Chromosomal | 1    | 0    |
|                                  | None        | 11   | 9.1  |
|                                  | Panel       | 1    | 0    |
|                                  | Targeted    | 8    | 25   |
| <b>Tumour syndromes</b>          |             | 75   | 9.3  |
|                                  | Chromosomal | 1    | 0    |
|                                  | Exome       | 1    | 0    |
|                                  | None        | 14   | 14.3 |
|                                  | Panel       | 12   | 0    |
|                                  | Targeted    | 47   | 10.6 |
| <b>Unclassified</b>              |             | 20   | 30   |
|                                  | Exome       | 1    | 100  |
|                                  | None        | 13   | 30.8 |
|                                  | Panel       | 3    | 0    |
|                                  | Targeted    | 3    | 33.3 |
| <b>Total</b>                     |             | 1177 | 31.5 |



461

462 **Table S7. Diagnoses enabled by research analysis.**

463 Each row represents an independent case.

464

465

| Category             | Recruited disease               | Gene           | Variant(s)                                                                                                                                                                                      |
|----------------------|---------------------------------|----------------|-------------------------------------------------------------------------------------------------------------------------------------------------------------------------------------------------|
| Coding SNV/indel     | Hereditary ataxia               | <i>EBF3</i>    | de novo ENST00000355311.5:c.530C>T:p.(Pro177Leu) variant detected in constrained coding region                                                                                                  |
| Mitochondrial genome | Ketotic hypoglycaemia           | <i>MT-ATP6</i> | m.9176T>G with 100% mutational load                                                                                                                                                             |
| Mitochondrial genome | Hereditary spastic paraplegia   | <i>MT-ATP6</i> | m.9176T>G with 100% mutational load                                                                                                                                                             |
| Mitochondrial genome | Intellectual disability         | <i>MT-ATP6</i> | m.8993T>G with 82% mutational load                                                                                                                                                              |
| Mitochondrial genome | Mitochondrial disorders         | <i>MT-ND3</i>  | m.10191T>C with 85% mutational load                                                                                                                                                             |
| Non-coding SNV/indel | Cone Dysfunction Syndrome       | <i>ABCA4</i>   | Known pathogenic (Clinvar VCV000092870.4), intronic variant (NM_000350.3(ABCA4):c.5461-10T>C) in compound heterozygosity with predicted damaging missense variant                               |
| Non-coding SNV/indel | Cone Dysfunction Syndrome       | <i>ABCA4</i>   | Known pathogenic (Clinvar VCV000092870.4), intronic variant (NM_000350.3(ABCA4):c.5461-10T>C) in compound heterozygosity with predicted damaging missense variant                               |
| Non-coding SNV/indel | Posterior segment abnormalities | <i>ABCA4</i>   | Known pathogenic (Clinvar VCV000092870.4), intronic variant (NM_000350.3(ABCA4):c.5461-10T>C) in compound heterozygosity with predicted damaging missense variant                               |
| Non-coding SNV/indel | Posterior segment abnormalities | <i>ABCA4</i>   | Known pathogenic (Clinvar VCV000092870.4), intronic variant (NM_000350.3(ABCA4):c.5461-10T>C) in compound heterozygosity with predicted damaging missense variant                               |
| Non-coding SNV/indel | Posterior segment abnormalities | <i>ABCA4</i>   | Known pathogenic (Clinvar VCV000092870.4), intronic variant (NM_000350.3(ABCA4):c.5461-10T>C) in compound heterozygosity with predicted damaging missense variant                               |
| Non-coding SNV/indel | Posterior segment abnormalities | <i>ABCA4</i>   | Known pathogenic (Clinvar VCV000092870.4), intronic variant (NM_000350.3(ABCA4):c.5461-10T>C) in compound heterozygosity with predicted damaging missense variant                               |
| Non-coding SNV/indel | Cone Dysfunction Syndrome       | <i>ABCA4</i>   | Known pathogenic intronic variant (ABCA4:ENST00000370225: c.5196+1137G>A) confirmed to disrupt splicing by in vitro assays. In compound heterozygosity with predicted damaging missense variant |
| Non-coding SNV/indel | Congenital muscular dystrophy   | <i>COL6A1</i>  | Known pathogenic (Clinvar VCV000542998.2) intronic variant (NM_001848.2(COL6A1):c.930+189C>T) observed as de novo                                                                               |
| Non-coding SNV/indel | Multiple endocrine tumours      | <i>MEN1</i>    | Known pathogenic (Clinvar VCV000200981.3) intronic variant (NM_000244.3(MEN1):c.799-9G>A)                                                                                                       |
| Non-coding SNV/indel | Hereditary spastic paraplegia   | <i>POLR3A</i>  | Known pathogenic (VCV000445922.2) intronic variant (NM_007055.4(POLR3A):c.1909+22G>A) in compound heterozygosity with LoF variant                                                               |
| Non-coding SNV/indel | Hereditary ataxia               | <i>POLR3A</i>  | Known pathogenic (VCV000445922.2) intronic variant (NM_007055.4(POLR3A):c.1909+22G>A) in compound heterozygosity with LoF variant                                                               |

|                      |                                                                                     |               |                                                                                                                                                                             |
|----------------------|-------------------------------------------------------------------------------------|---------------|-----------------------------------------------------------------------------------------------------------------------------------------------------------------------------|
| Non-coding SNV/indel | Congenital hearing impairment (profound/severe) and Posterior segment abnormalities | <i>USH2A</i>  | Known pathogenic (VCV000030722.3) intronic variant (NM_206933.3(USH2A):c.7595-2144A>G) in compound heterozygosity with LoF variant                                          |
| Non-coding SNV/indel | Cataracts                                                                           | <i>EPHA2</i>  | Known pathogenic (RCV000644433.1) intronic variant (NM_004431.5(EPHA2):c.2826-9G>A) with incomplete penetrance in unaffected mother                                         |
| Non-coding SNV/indel | Congenital hearing impairment (profound/severe) and posterior segment abnormalities | <i>GUCY2D</i> | Novel 5'-UTR variant (NM_000180.3:c.-148T>C) confirmed to affect expression by in vitro assays. In compound heterozygosity with predicted damaging variant                  |
| Non-coding SNV/indel | Leber Congenital Amaurosis / Early-Onset Severe Retinal Dystrophy                   | <i>GUCY2D</i> | Novel 5'-UTR variant (NM_000180.3:c.-148T>C) confirmed to affect expression by in vitro assays. In compound heterozygosity with predicted damaging variant                  |
| Non-coding SNV/indel | Congenital hearing impairment (profound/severe) and posterior segment abnormalities | <i>USH2A</i>  | Novel intronic variant (USH2A:ENST00000307340:c.12066+4409C>G) confirmed to disrupt splicing by in vitro assays. In compound heterozygosity with predicted damaging variant |
| Non-coding SNV/indel | Rod-cone dystrophy                                                                  | <i>CRB1</i>   | Novel intronic variant (ENST00000367400:c.3879-1203C>G) confirmed to disrupt splicing by in vitro assays                                                                    |
| Non-coding SNV/indel | Rod-cone dystrophy                                                                  | <i>CRB1</i>   | Novel intronic variant (CRB1:ENST00000367400:c.4006-10A>G) confirmed to disrupt splicing by in vitro assays. In compound heterozygosity with predicted damaging variant     |
| Non-coding SNV/indel | Rod-cone dystrophy                                                                  | <i>CHM</i>    | Novel hemizygous promoter variant (CHM:ENST00000357749.2:c.-98:G:A) confirmed to reduce expression by luciferase assay. <sup>26</sup>                                       |
| Non-coding SNV/indel | Rod-cone dystrophy                                                                  | <i>CHM</i>    | Novel hemizygous intronic variant (CHM:ENST00000357749.2:c.315-1536A>G) confirmed to disrupt splicing by in vitro assays. <sup>24</sup>                                     |
| Non-coding SNV/indel | Inherited optic neuropathies                                                        | <i>OPA1</i>   | Novel intronic variant (OPA1:NM_130837.2:c.610+360G>A) confirmed to disrupt splicing by in vitro assays.                                                                    |
| Non-coding SNV/indel | Retinitis pigmentosa                                                                | <i>PRPF31</i> | Novel intronic variant (PRPF31:ENST00000321030:c.1374+569 C>G) confirmed to splice in a new exon by RT-PCR and sequencing of patient sample.                                |
| Structural variant   | Bardet-Biedl Syndrome                                                               | <i>BBS1</i>   | Heterozygous deletion of exons 10-11 in compound heterozygosity with predicted damaging SNV                                                                                 |

|                    |                                                             |                |                                                                                                                          |
|--------------------|-------------------------------------------------------------|----------------|--------------------------------------------------------------------------------------------------------------------------|
| Structural variant | Corneal abnormalities                                       | <i>SLC4A11</i> | Heterozygous deletion of whole gene in compound heterozygosity with predicted damaging SNV                               |
| Structural variant | Posterior segment abnormalities                             | <i>USH2A</i>   | Heterozygous duplication of exons 57-60 in compound heterozygosity with predicted damaging SNV                           |
| Structural variant | Rod-cone dystrophy                                          | <i>RP2</i>     | Hemizygous deletion of exon 3 in male proband and heterozygous in affected mother                                        |
| Structural variant | Rod-cone dystrophy                                          | <i>CNGB1</i>   | Homozygous deletion of exons 25-27 in proband and affected sib                                                           |
| Structural variant | Hereditary ataxia                                           | <i>ITPR1</i>   | Heterozygous deletion of exons 1-51 in proband and affected sib and father                                               |
| Structural variant | Hereditary ataxia                                           | <i>RARS2</i>   | Heterozygous deletion of exon 10 in compound heterozygosity with predicted damaging SNV in proband and affected sib      |
| Structural variant | Multiple Tumours                                            | <i>MSH2</i>    | Heterozygous duplication of exons 1-7 in tandem in compound heterozygosity with predicted damaging SNV                   |
| Structural variant | Mitochondrial disorders                                     | <i>CEP78</i>   | Heterozygous deletion of exons 1 to 5 in compound heterozygosity with predicted damaging SNV in proband and affected sib |
| Structural variant | Glaucoma (developmental)                                    | <i>PBX1</i>    | Heterozygous deletion of exons 3-4                                                                                       |
| Structural variant | Cystic kidney disease                                       | <i>NPHP1</i>   | Homozygous deletion of whole gene                                                                                        |
| Structural variant | Complex Parkinsonism (includes pallido-pyramidal syndromes) | <i>VPS13A</i>  | Heterozygous deletion of exon 14 in compound heterozygosity with predicted damaging SNV                                  |
| Structural variant | Kleine-Levin syndrome                                       | <i>LPIN1</i>   | Heterozygous deletion of exon 19 in compound heterozygosity with predicted damaging SNV                                  |
| Structural variant | Hereditary ataxia                                           | <i>ANO10</i>   | Heterozygous deletion of exon 12 in compound heterozygosity with predicted damaging SNV                                  |
| Structural variant | Atypical haemolytic uraemic syndrome                        | <i>CFH</i>     | Heterozygous deletion of exons 20-22                                                                                     |
| Structural variant | Hereditary ataxia                                           | <i>ITPR1</i>   | Heterozygous deletion of whole gene                                                                                      |
| Structural variant | Cystic kidney disease                                       | <i>HNF1B</i>   | Heterozygous deletion of whole gene                                                                                      |
| Structural variant | Distal myopathies                                           | <i>PMP22</i>   | Gain of whole copy of gene                                                                                               |
| Structural variant | Charcot-Marie-Tooth disease                                 | <i>SETX</i>    | CNV in compound heterozygosity with predicted damaging SNV                                                               |
| Structural variant | Inherited macular dystrophy                                 | <i>BEST1</i>   | Heterozygous deletion of exons 1-2 in compound heterozygosity with predicted damaging SNV                                |
| Structural variant | Rod-cone dystrophy                                          | <i>PRPF31</i>  | Heterozygous deletion of exons 4-12                                                                                      |
| Structural variant | Rod-cone dystrophy                                          | <i>PRPF31</i>  | Heterozygous deletion of exons 1-3                                                                                       |
| Structural variant | Rod-cone dystrophy                                          | <i>PRPF31</i>  | Heterozygous deletion of exon 1                                                                                          |
| Structural variant | Cone Dysfunction Syndrome                                   | <i>CRX</i>     | Homozygous deletion of whole gene                                                                                        |
| Structural variant | Rod-cone dystrophy                                          | <i>CHM</i>     | Heterozygous deletion in intron 12 with predicted cryptic splicing effect                                                |
| Structural variant | Multiple bowel polyps                                       | <i>APC</i>     | Heterozygous deletion of exon 1                                                                                          |

|                    |                                                    |                |                                                                                          |
|--------------------|----------------------------------------------------|----------------|------------------------------------------------------------------------------------------|
| Structural variant | Stickler syndrome                                  | <i>COL11A1</i> | Heterozygous deletion of exon 47                                                         |
| Structural variant | Congenital hearing impairment<br>(profound/severe) | <i>PAX3</i>    | Heterozygous deletion of exons 6-7                                                       |
| Structural variant | Dilated Cardiomyopathy (DCM)                       | <i>LMNA</i>    | Heterozygous deletion of exon 5                                                          |
| Structural variant | Neuro-endocrine Tumours-<br>PCC and PGL            | <i>MAX</i>     | Heterozygous deletion of exons 3-4                                                       |
| Structural variant | Epileptic encephalopathy                           | <i>WWOX</i>    | Heterozygous deletion in intron 4 in compound heterozygosity with predicted damaging SNV |
| Structural variant | Intellectual disability                            | <i>AHDC1</i>   | Heterozygous deletion of whole gene                                                      |
| Structural variant | Congenital hearing impairment<br>(profound/severe) | <i>FOXC1</i>   | Homozygous deletion of whole gene                                                        |
| Structural variant | Intellectual disability                            | <i>TCF4</i>    | Heterozygous deletion of exon 1                                                          |
| Structural variant | Intellectual disability                            | <i>PRRT2</i>   | Heterozygous deletion of whole gene                                                      |
| Structural variant | Bilateral microtia                                 | <i>OTX2</i>    | Gain of whole copy of gene                                                               |
| Structural variant | Hereditary spastic paraplegia                      | <i>SPAST</i>   | Heterozygous deletion of exon 1                                                          |
| Structural variant | Hereditary spastic paraplegia                      | <i>SPAST</i>   | Heterozygous deletion of exon 17                                                         |
| Structural variant | Congenital myopathy                                | <i>COL6A2</i>  | Heterozygous deletion of exons 2-16                                                      |
| Structural variant | Hereditary spastic paraplegia                      | <i>SPAST</i>   | Heterozygous deletion of exon 1                                                          |

466  
467  
468

469 **Table S8. Novel disease gene candidates.**

470 22 novel candidates from the burden testing (with corresponding p values and overall false discovery rate q values adjusted for the total number  
 471 of 590,451 tests) are shown, representing the most likely examples of fully penetrant Mendelian disease genes based on strict criteria of: (i)  
 472 evidence from 3 or more unsolved, independent cases or 2 with existing functional evidence (either protein-protein interactions to known  
 473 disease genes in the PanelApp disease panel coming from direct interactions with curated database or experimental evidence in StringDB<sup>24</sup> or  
 474 from mouse models described by the International Mouse Phenotyping Consortium (IMPC)<sup>25</sup> or the Mouse Genome Database<sup>26</sup>), (ii) all variants  
 475 driving the signal in the cases are completely absent from controls and absent from gnomAD or sufficiently rare given the expected prevalence,  
 476 penetrance and age of onset of the disease, and (iii) observed/expected ratio of predicted LoF variants in gnomAD < 0.5 for predictions based  
 477 on heterozygous, LoF variants  
 478

| Disease                                   | Gene                                                  | Predicted damaging variants in cases (heterozygous, in singleton cases and not observed in gnomAD unless otherwise stated)                                                                                                                                                                                                             | Evidence                                                                                                                                                                                                                                                                                                                                                                                                                                             |
|-------------------------------------------|-------------------------------------------------------|----------------------------------------------------------------------------------------------------------------------------------------------------------------------------------------------------------------------------------------------------------------------------------------------------------------------------------------|------------------------------------------------------------------------------------------------------------------------------------------------------------------------------------------------------------------------------------------------------------------------------------------------------------------------------------------------------------------------------------------------------------------------------------------------------|
| Hereditary spastic paraplegia             | <i>UBAP1</i><br>(p=4.8x10 <sup>-7</sup> ;<br>q=0.002) | <ul style="list-style-type: none"> <li>ENST00000297661.4:c.535G&gt;T:p.(Glu179*) in 4 cases</li> <li>ENST00000297661.8:c.373C&gt;T:p.(Gln125*) in 1 case</li> <li>3 cases involved larger family structures with affected siblings and affected and unaffected parents and in all cases the variant segregated with disease</li> </ul> | <ul style="list-style-type: none"> <li>Only 3 LoF variants in controls, odds-ratio=65.7, and no nonsense variants</li> <li>GnomAD o/e LoF = 0.12 (0.05 - 0.38)</li> <li>Part of ESCRT-I/cargo complex with <i>VPS37A</i>, associated with spastic paraplegia type 53 and interacts with other spastic paraplegia genes: <i>AP4E1</i>, <i>TUBB4A</i>, <i>AP4S1</i>, <i>KIF1A</i>, <i>ALS2</i>, <i>KIF5A</i>, <i>AP4M1</i> and <i>AP4B1</i></li> </ul> |
| Familial thoracic aortic aneurysm disease | <i>OPCML</i><br>(p=9.3x10 <sup>-5</sup> ;<br>q=0.078) | <ul style="list-style-type: none"> <li>ENST00000331898:c.752dup:p.(Met251Ilefs*3) in 1 case</li> <li>ENST00000331898:c.90del:p.(Pro30Profs*16) in proband but not unaffected parent in 1 case</li> <li>ENST00000331898:c.167+132134G&gt;T::p.? splice donor variant in 1 case</li> </ul>                                               | <ul style="list-style-type: none"> <li>Only 2 LoF variants in controls, odds-ratio= 69.0</li> <li>GnomAD o/e LoF = 0.25 (0.12 - 0.57)</li> </ul>                                                                                                                                                                                                                                                                                                     |
| Ductal plate malformations                | <i>SRP9</i><br>(p=1.5x10 <sup>-5</sup> ;<br>q=0.028)  | <ul style="list-style-type: none"> <li>ENST00000304786.11:c.211C&gt;T:p.(Arg71*) in 1 case</li> <li>ENST00000304786.11:c.3G&gt;A:p.0? in 1 case</li> </ul>                                                                                                                                                                             | <ul style="list-style-type: none"> <li>Only 2 LoF variants in controls, odds-ratio= 632.4</li> <li>GnomAD o/e LoF = 0.19 (0.07 - 0.9)</li> </ul>                                                                                                                                                                                                                                                                                                     |

|                                           |                                                         |                                                                                                                                                                                                                                                                                                                                                                                             |                                                                                                                                                                                                                                                                                                                                                                                                                                                                                                                                                                                                           |
|-------------------------------------------|---------------------------------------------------------|---------------------------------------------------------------------------------------------------------------------------------------------------------------------------------------------------------------------------------------------------------------------------------------------------------------------------------------------------------------------------------------------|-----------------------------------------------------------------------------------------------------------------------------------------------------------------------------------------------------------------------------------------------------------------------------------------------------------------------------------------------------------------------------------------------------------------------------------------------------------------------------------------------------------------------------------------------------------------------------------------------------------|
| Charcot-Marie tooth disease               | <i>SORD</i><br>(p=7.2x10 <sup>-6</sup> ;<br>q=0.017)    | <ul style="list-style-type: none"> <li>• Hom ENST00000267814.9:c.757del:p.(Ala253Glnfs*27) in proband, het in unaffected parents in 1 case</li> <li>• Hom ENST00000267814.9:c.757del:p.(Ala253Glnfs*27) in proband, het in unaffected parent in 1 case</li> <li>• Het ENST00000267814.9:c.757del:p.(Ala253Glnfs*27) in compound heterozygosity with missense variants in 3 cases</li> </ul> | <ul style="list-style-type: none"> <li>• Role in protein export pathway with other ductal plate malformation genes: <i>SEC61B</i> (polycystic liver disease 1) and <i>SEC63</i> (polycystic liver disease 2)</li> <li>• Variant never observed under a recessive MOI in controls and only one hom in gnomAD</li> <li>• Only 2 control cases contain recessive, LoF variants in <i>SORD</i></li> <li>• <i>SORD</i> converts sorbitol to fructose and is part of the curated fructose and mannose metabolism pathway [KEGG] with <i>HK1</i>, associated with hereditary neuropathy (OMIM:605285)</li> </ul> |
| Atypical haemolytic uraemic syndrome      | <i>MAFG</i><br>(p=3.1x10 <sup>-5</sup> ;<br>q=0.044)    | <ul style="list-style-type: none"> <li>• ENST00000357736.4:c.395_397del:p.(Pro132del) disruptive inframe deletion in two cases</li> </ul>                                                                                                                                                                                                                                                   | <ul style="list-style-type: none"> <li>• Same variant in one periodic fever syndromes and amyloidosis control sharing some general genitourinary system abnormalities in common but no other LoF variants in controls (odds-ratio=374.7)</li> <li>• GnomAD o/e LoF = 0 (0 - 0.69)</li> <li>• Thrombocytopenia observed in patients and an IMPC mouse models with <i>Mafg</i> disruptions</li> </ul>                                                                                                                                                                                                       |
| Familial Thoracic Aortic Aneurysm Disease | <i>NRROS</i><br>(p=3.8x10 <sup>-5</sup> ;<br>q=0.050)   | <ul style="list-style-type: none"> <li>• ENST00000328557:c.190delC:p.(Leu64Trpfs*81) in two cases, 0.0004% in gnomAD</li> <li>• ENST00000328557:c.346dupT:p.(Cys116Leufs*91) in proband and affected mother in 1 case</li> </ul>                                                                                                                                                            | <ul style="list-style-type: none"> <li>• Only 1 LoF variant in controls, odds-ratio= 138</li> <li>• GnomAD o/e LoF = 0.23 (0.11 - 0.53)</li> </ul>                                                                                                                                                                                                                                                                                                                                                                                                                                                        |
| Brain channelopathy                       | <i>KATNBL1</i><br>(p=6.5x10 <sup>-5</sup> ;<br>q=0.067) | <ul style="list-style-type: none"> <li>• ENST00000256544:c.339delA:p.(Lys113Asnfs*51) in 2 cases, 0.0004% in gnomAD</li> <li>• ENST00000256544:c.115_116insT: p.(Glu39Valfs*3) in 1 case</li> </ul>                                                                                                                                                                                         | <ul style="list-style-type: none"> <li>• Only 7 LoF variant in controls, odds-ratio= 51</li> <li>• GnomAD o/e LoF = 0.17 (0.08 - 0.45)</li> </ul>                                                                                                                                                                                                                                                                                                                                                                                                                                                         |
| Hereditary spastic paraplegia             | <i>SLC35G2</i><br>(p=2.4x10 <sup>-5</sup> ;<br>q=0.037) | <ul style="list-style-type: none"> <li>• ENST00000446465:c.896dup:p.(Ile300Asnfs*49) in 2 cases: in proband and affected sib in one of them</li> <li>• ENST00000446465:c.290dup:p.(Asn97Lysfs*27) in 1 case, 0.0004% in gnomAD</li> <li>• ENST00000446465:c.507_509del:p.(Phe170del) disruptive inframe deletion in 1 case, 0.0008% in gnomAD</li> </ul>                                    | <ul style="list-style-type: none"> <li>• Only 4 LoF variant in controls, odds-ratio= 39</li> <li>• GnomAD o/e LoF = 0.37 (0.18 - 0.85)</li> </ul>                                                                                                                                                                                                                                                                                                                                                                                                                                                         |

|                                            |                                                         |                                                                                                                                                                                                                                                                                                    |                                                                                                                                                                                                                                                                                                                                                                                              |
|--------------------------------------------|---------------------------------------------------------|----------------------------------------------------------------------------------------------------------------------------------------------------------------------------------------------------------------------------------------------------------------------------------------------------|----------------------------------------------------------------------------------------------------------------------------------------------------------------------------------------------------------------------------------------------------------------------------------------------------------------------------------------------------------------------------------------------|
| Primary immunodeficiency                   | <i>KDM4C</i><br>(p=1.4x10 <sup>-4</sup> ;<br>q=0.091)   | <ul style="list-style-type: none"> <li>ENST00000420847:c.741+1G&gt;A:p.? splice donor variant in 1 case, 0.002% in gnomAD</li> <li>ENST00000420847:c.196dup:p.(Cys66Leufs*15) in 1 case</li> <li>ENST00000536108:c.1060C&gt;T:p.(Gln332*) in 1 case</li> </ul>                                     | <ul style="list-style-type: none"> <li>Only 13 LoF variant in controls, odds-ratio= 36</li> <li>GnomAD o/e LoF = 0.38 (0.27 - 0.54)</li> <li>Heterozygous <i>Kdm4c</i> null mice from IMPC exhibits immune phenotypes</li> </ul>                                                                                                                                                             |
| Unexplained kidney failure in young people | <i>PLEKHD1</i><br>(p=5.1x10 <sup>-5</sup> ;<br>q=0.058) | <ul style="list-style-type: none"> <li>ENST00000322564:c.1015G&gt;T:p.(Glu339*) in 1 case</li> <li>ENST00000322564:c.245G&gt;T:p.(Gly82Val) in 1 case</li> <li>ENST00000322564:c.1159_1161del:p.(Glu387del) disruptive inframe deletion variant in 1 case</li> </ul>                               | <ul style="list-style-type: none"> <li>Only 7 predicted damaging variants in controls, odds-ratio=55</li> <li>GnomAD o/e missense = 0.72 (0.65 - 0.81), o/e LoF = 0.47 (0.30 - 0.74)</li> </ul>                                                                                                                                                                                              |
| Lipoedema disease                          | <i>CDH10</i><br>p=4.7x10 <sup>-5</sup> ;<br>q=0.054)    | <ul style="list-style-type: none"> <li>ENST00000264463.8:c.2042T&gt;C:p.(Ile681Thr) in 2 cases</li> <li>ENST00000264463.8:c.2173C&gt;A:p.(Pro725Thr) in 1 case</li> </ul>                                                                                                                          | <ul style="list-style-type: none"> <li>Only 18 predicted damaging variants in controls, odds-ratio=49</li> <li>GnomAD o/e missense = 0.69 (0.63 - 0.76), o/e LoF = 0.23 (0.14 - 0.42)</li> </ul>                                                                                                                                                                                             |
| Extreme early-onset hypertension           | <i>UBE2F</i><br>(p=7.9x10 <sup>-5</sup> ;<br>q=0.074)   | <ul style="list-style-type: none"> <li>ENST00000272930.8:c.209C&gt;T:p.(Thr70Ile) in 1 case, 0.0004% in gnomad</li> <li>ENST00000272930.8:c.53G&gt;A:p.(Arg18Gln) in 1 case, 0.003% in gnomad</li> <li>ENST00000439338.5:c.149-6_149-5insA:p.? splice region variant in 1 case</li> </ul>          | <ul style="list-style-type: none"> <li>Only 9 predicted damaging variants in controls, odds-ratio=45</li> <li>GnomAD o/e missense = 0.64 (0.53 - 0.78), o/e LoF = 0.08 (0.03 - 0.38)</li> <li>Role in polyubiquitination of substrate pathway with other hypertension genes: <i>CUL3</i> (Pseudohypoaldosteronism, type IIE) and <i>KLHL3</i> (Pseudohypoaldosteronism, type IID)</li> </ul> |
| Distal myopathies                          | <i>NSUN7</i><br>(p=1.2x10 <sup>-4</sup> ;<br>q=0.087)   | <ul style="list-style-type: none"> <li>ENST00000381782.6:c.2028_2029del:p.(Tyr676fs) in 1 case, 0.003% in gnomAD</li> <li>ENST00000381782.2:c.1440_1441dup:p.(Ile481Lysfs*26) in 1 case, 0.003% in gnomAD</li> <li>ENST00000316607.5:c.1036+6T&gt;C:p.? splice region variant in 1 case</li> </ul> | <ul style="list-style-type: none"> <li>Only 9 predicted damaging variants in controls, odds-ratio=39</li> <li>GnomAD o/e LoF = 0.49 (0.32 - 0.79)</li> </ul>                                                                                                                                                                                                                                 |
| Non-CF bronchiectasis                      | <i>FOXJ1</i><br>(p=1.2x10 <sup>-4</sup> ;<br>q=0.088)   | <ul style="list-style-type: none"> <li><i>De novo</i> ENST00000322957.6:c.967del:p.(Glu323Serfs*10) in 2 trio cases</li> <li>ENST00000322957.6:c.1058T&gt;G:p.(Ile353Ser) in 1 case, 0.002% in gnomAD</li> </ul>                                                                                   | <ul style="list-style-type: none"> <li>Only 15 predicted damaging variants in controls, odds-ratio=36 and only 1 LoF variant</li> <li>GnomAD o/e LoF = 0 (0 - 0.28)</li> <li>Foxj1 KO mouse exhibits hydroencephaly and absent respiratory motile cilia modelling some patient phenotypes</li> </ul>                                                                                         |
| Extreme early-onset hypertension           | <i>FCHO1</i><br>p=1.6x10 <sup>-4</sup> ;<br>q=0.096)    | <ul style="list-style-type: none"> <li>ENST00000593385.5:c.-14+8C&gt;T:p.(=)splice region variant in 1 case</li> <li>ENST00000593385.5:c.-194-6C&gt;G:p.(=)splice region variant in 1 case</li> <li>ENST00000593385.5:c.-14+5G&gt;A:p.(=)splice region variant in 1 case</li> </ul>                | <ul style="list-style-type: none"> <li>Only 12 predicted damaging variants in controls, odds-ratio=34</li> <li>GnomAD o/e LoF = 0.14 (0.08 - 0.26)</li> </ul>                                                                                                                                                                                                                                |

|                                           |                                                                    |                                                                                                                                                                                                                                                                                                                                                                                                           |                                                                                                                                                                                                                                                                                                     |
|-------------------------------------------|--------------------------------------------------------------------|-----------------------------------------------------------------------------------------------------------------------------------------------------------------------------------------------------------------------------------------------------------------------------------------------------------------------------------------------------------------------------------------------------------|-----------------------------------------------------------------------------------------------------------------------------------------------------------------------------------------------------------------------------------------------------------------------------------------------------|
|                                           |                                                                    |                                                                                                                                                                                                                                                                                                                                                                                                           | <ul style="list-style-type: none"> <li>• Role in cargo recognition for clathrin-mediated endocytosis pathway with other hypertension genes: AGTR1 (essential hypertension)</li> </ul>                                                                                                               |
| Primary immunodeficiency                  | <i>ANKRD2</i><br>(p=1.4x10 <sup>-4</sup> ;<br>q=0.091)             | <ul style="list-style-type: none"> <li>• ENST00000298808.9:c.566C&gt;G:p.(Ser189Cys) in proband but not unaffected mother in 1 case</li> <li>• ENST00000298808.9:c.541C&gt;T:p.(Arg181Cys) in 1 case, 0.00006% in gnomAD</li> <li>• ENST00000298808.9:c.283G&gt;T:p.(Val95Leu) in 1 case, 0.0004% in gnomAD</li> <li>• ENST00000307518.9:c.766C&gt;T:p.(Arg256Trp) in 1 case, 0.006% in gnomAD</li> </ul> | <ul style="list-style-type: none"> <li>• Only 37 predicted damaging variants in controls, odds-ratio=17</li> <li>• GnomAD o/e missense = 0.78 (0.69 - 0.89), o/e LoF = 0.79 (0.52 - 1.24)</li> </ul>                                                                                                |
| Mitochondrial disorders                   | <i>CITED2</i><br>(p=1.3x10 <sup>-4</sup> ;<br>q=0.089)             | <ul style="list-style-type: none"> <li>• ENST00000367651:c.685_686del:p.(Met229Valfs*25) in 1 case</li> <li>• ENST00000367651:c.-7A&gt;G:p.(=) splice region variant in 1 case</li> <li>• ENST00000367651:c.559_585del:p.(Ala187_Gly195del) inframe deletion in 1 case, 0.00001% in gnomAD</li> </ul>                                                                                                     | <ul style="list-style-type: none"> <li>• Only 6 predicted damaging variants in controls, odds-ratio=42 including 1 LoF</li> <li>• GnomAD o/e LoF = 0 (0 - 0.63)</li> </ul>                                                                                                                          |
| Lipoedema disease                         | <i>DIS3L2</i><br>(p=1.0x10 <sup>-4</sup> ;<br>q=0.082)             | <ul style="list-style-type: none"> <li>• ENST00000418143:c.254del:p.(Gly85Valfs*82) in 1 case, 0.009% in gnomAD</li> <li>• ENST00000273009:c.491_514del:p.(Val164_Asp171del) inframe deletion in 1 case</li> <li>• ENST00000424049:c.1148G&gt;A:p.(Arg383Hisext*-383) stop lost variant in 1 case, 0.002% in gnomAD</li> </ul>                                                                            | <ul style="list-style-type: none"> <li>• Only 24 predicted damaging variants in controls, odds-ratio=37</li> <li>• GnomAD o/e LoF = 0.18 (0.1 - 0.33)</li> </ul>                                                                                                                                    |
| Rod-cone dystrophy                        | <i>RALGPS2</i><br>(p=5.6x10 <sup>-5</sup> ;<br>q=0.061)            | <ul style="list-style-type: none"> <li>• ENST00000367632.2:c.229C&gt;T:p.(Gln77*) in proband but not unaffected parent. Observed at 0.003% in gnomAD</li> <li>• ENST00000324778.5:c.462T&gt;G:p.(Tyr154*) in 1 case</li> <li>• ENST00000324778.5:c.-84+3C&gt;T:p.(=) splice region variant in 2 cases</li> </ul>                                                                                          | <ul style="list-style-type: none"> <li>• Only 3 predicted damaging variants in controls, odds-ratio=35.3</li> <li>• GnomAD o/e LoF = 0.23 (0.14 - 0.41)</li> </ul>                                                                                                                                  |
| Familial thoracic aortic aneurysm disease | <i>ABRAXAS2 (FAM175B)</i><br>(p=2.4x10 <sup>-5</sup> ;<br>q=0.037) | <ul style="list-style-type: none"> <li>• ENST00000298492.5:c.268-10_268-7del:p.? splice region variant in proband but not unaffected parent in 1 case</li> <li>• ENST00000298492.5:c.578+3A&gt;G:p.? splice region variant in 1 case</li> <li>• ENST00000298492.5:c.689G&gt;C:p.(Ser230Thr) in 1 case</li> <li>• ENST00000298492.5:c.1013G&gt;T:p.(Gly338Val) in 1 case</li> </ul>                        | <ul style="list-style-type: none"> <li>• Only 5 predicted damaging variants in controls, odds-ratio=82.3</li> <li>• GnomAD o/e missense = 0.8 (0.71 - 0.9), o/e LoF = 0.32 (0.18 - 0.6)</li> </ul>                                                                                                  |
| Dilated cardiomyopathy                    | <i>BMP10</i><br>(p=7.6x10 <sup>-5</sup> ;<br>q=0.073)              | <ul style="list-style-type: none"> <li>• ENST00000295379.1:c.1263_1264del:p.(Cys421Trpfs*3) in 1 case</li> <li>• ENST00000295379.1:c.953C&gt;T:p.(Ala318Val) in proband and affected sibling in 1 case</li> <li>• ENST00000295379.1:c.1037G&gt;A:p.(Gly346Glu) in 1 case. 0.003% in gnomAD</li> </ul>                                                                                                     | <ul style="list-style-type: none"> <li>• Only 4 predicted damaging variants in controls, odds-ratio=56.2</li> <li>• GnomAD o/e missense = 0.81 (0.72 - 0.92), o/e LoF = 0.08 (0.03 - 0.39)</li> <li>• Mouse knockout of <i>Bmp10</i> exhibits abnormal heart morphology, enlarged heart,</li> </ul> |



|                        |                                                     |                                                                                                                                                                                                                                                                                                                                                                                                 |                                                                                                                                                                                                   |
|------------------------|-----------------------------------------------------|-------------------------------------------------------------------------------------------------------------------------------------------------------------------------------------------------------------------------------------------------------------------------------------------------------------------------------------------------------------------------------------------------|---------------------------------------------------------------------------------------------------------------------------------------------------------------------------------------------------|
|                        |                                                     | haemorrhage, decreased heart rate and ventricular hypoplasia                                                                                                                                                                                                                                                                                                                                    |                                                                                                                                                                                                   |
| Dilated cardiomyopathy | <i>PSMB11</i><br>(p=9.0x10 <sup>-6</sup> ; q=0.020) | <ul style="list-style-type: none"> <li>ENST00000408907.2:c.169_171dup:p.(Phe57dup) inframe insertion in proband and affected mother but not unaffected father in 1 case</li> <li>ENST00000408907:c.499G&gt;A:p.(Gly167Ser) in proband but not unaffected mother in 1 case, 0.002% in gnomAD</li> <li>ENST00000408907:c.502_503del::p.(Thr168Profs*48) in 1 case, 0.000004% in gnomAD</li> </ul> | <ul style="list-style-type: none"> <li>Only 1 predicted damaging variant in controls, odds-ratio=224.4</li> <li>GnomAD o/e missense = 0.99 (0.88 - 1.11), o/e LoF = 1.14 (0.66 - 1.83)</li> </ul> |

479

480 **Table S9. Reported healthcare benefits.**

| Disease                                         | Gene                | Change in medication | Additional surveillance for proband or relatives | Clinical trial eligibility | Informs reproductive choice | Other |
|-------------------------------------------------|---------------------|----------------------|--------------------------------------------------|----------------------------|-----------------------------|-------|
| Intellectual disability                         | <i>SLC2A1</i>       | Y                    |                                                  |                            | Y                           |       |
| Mitochondrial disorders                         | <i>FLAD1</i>        | Y                    |                                                  |                            | Y                           |       |
| Hereditary ataxia                               | <i>CACNA1A</i>      | Y                    |                                                  |                            |                             |       |
| CAKUT                                           | <i>RET</i>          | Y                    | Y                                                |                            |                             |       |
| Rod-cone dystrophy                              | <i>USH2A</i>        |                      | Y                                                | Y                          | Y                           |       |
| Cone Dysfunction Syndrome                       | <i>CABP4</i>        |                      | Y                                                | Y                          | Y                           |       |
| Congenital hearing impairment (profound/severe) | <i>USH2A</i>        |                      | Y                                                | Y                          | Y                           |       |
| Rod-cone dystrophy                              | <i>USH2A</i>        |                      | Y                                                | Y                          |                             |       |
| Rod-cone dystrophy                              | <i>BBS1</i>         |                      | Y                                                | Y                          |                             |       |
| Inherited macular dystrophy                     | <i>BBS1</i>         |                      | Y                                                | Y                          |                             |       |
| Rare multisystem ciliopathy disorders           | <i>CEP290</i>       |                      | Y                                                |                            | Y                           |       |
| Bilateral microtia                              | <i>SIX1</i>         |                      | Y                                                |                            | Y                           |       |
| Bardet-Biedl Syndrome                           | <i>BBS1</i>         |                      | Y                                                |                            | Y                           |       |
| Bardet-Biedl Syndrome                           | <i>BBS1</i>         |                      | Y                                                |                            | Y                           |       |
| Rare multisystem ciliopathy disorders           | <i>EVC</i>          |                      | Y                                                |                            | Y                           |       |
| Intellectual disability                         | <i>PURA or RLIM</i> |                      | Y                                                |                            | Y                           |       |
| Familial exudative retinopathy                  | <i>LRP5</i>         |                      | Y                                                |                            | Y                           |       |
| Hereditary spastic paraplegia                   | <i>SPAST</i>        |                      | Y                                                |                            | Y                           |       |
| Hereditary spastic paraplegia                   | <i>CYP7B1</i>       |                      | Y                                                |                            | Y                           |       |
| Hereditary ataxia                               | <i>SYNE1</i>        |                      | Y                                                |                            | Y                           |       |
| Hereditary spastic paraplegia                   | <i>NF1</i>          |                      | Y                                                |                            | Y                           |       |
| Inherited white matter disorders                | <i>PSAP</i>         |                      | Y                                                |                            |                             |       |
| Brugada syndrome                                | <i>SCN5A</i>        |                      | Y                                                |                            |                             |       |

|                                                                       |                |   |   |     |
|-----------------------------------------------------------------------|----------------|---|---|-----|
| Bardet-Biedl Syndrome                                                 | <i>BBS1</i>    | Y |   |     |
| Familial Tumours Syndromes of the central & peripheral Nervous system | <i>PTEN</i>    | Y |   |     |
| Long QT syndrome                                                      | <i>SLC16A1</i> | Y |   |     |
| Bardet-Biedl Syndrome                                                 | <i>BBS1</i>    | Y |   |     |
| Dilated Cardiomyopathy (DCM)                                          | <i>TTN</i>     | Y |   |     |
| Left Ventricular Noncompaction Cardiomyopathy                         | <i>MYH7</i>    | Y |   |     |
| Rod-cone dystrophy                                                    | <i>PROM1</i>   |   | Y | Y   |
| Rod-cone dystrophy                                                    | <i>CERKL</i>   |   | Y | Y   |
| Cone Dysfunction Syndrome                                             | <i>ABCA4</i>   |   | Y | Y   |
| Inherited macular dystrophy                                           | <i>ABCA4</i>   |   | Y | Y   |
| Rod-cone dystrophy                                                    | <i>AGBL5</i>   |   | Y | Y   |
| Leber Congenital Amaurosis / Early-Onset Severe Retinal Dystrophy     | <i>GUCY2D</i>  |   | Y | Y   |
| Osteogenesis Imperfecta                                               | <i>COL1A1</i>  |   | Y |     |
| Congenital hearing impairment (profound/severe)                       | <i>USH2A</i>   |   |   | Y Y |
| Intellectual disability                                               | <i>SRD5A3</i>  |   |   | Y Y |
| Paediatric motor neuronopathies                                       | <i>DYNC1H1</i> |   |   | Y   |
| Paediatric motor neuronopathies                                       | <i>SPG7</i>    |   |   | Y   |
| Early onset dystonia                                                  | <i>ADAR</i>    |   |   | Y   |
| Hereditary spastic paraplegia                                         | <i>KIF1A</i>   |   |   | Y   |
| Rod-cone dystrophy                                                    | <i>ADAM9</i>   |   |   | Y   |
| Hereditary spastic paraplegia                                         | <i>CYP7B1</i>  |   |   | Y   |
| Hereditary ataxia                                                     | <i>SPG7</i>    |   |   | Y   |
| Congenital hearing impairment (profound/severe)                       | <i>MORC2</i>   |   |   | Y   |
| Intellectual disability                                               | <i>ALG11</i>   |   |   | Y   |
| Rod-cone dystrophy                                                    | <i>IFT140</i>  |   |   | Y   |
| Cone Dysfunction Syndrome                                             | <i>KCNV2</i>   |   |   | Y   |
| Stickler syndrome                                                     | <i>COL11A1</i> |   |   | Y   |
| Congenital hearing impairment (profound/severe)                       | <i>RAF1</i>    |   |   | Y   |

|                                                 |                           |   |   |
|-------------------------------------------------|---------------------------|---|---|
| Intellectual disability                         | <i>ASPM</i>               | Y |   |
| Hereditary ataxia                               | <i>PLP1</i>               | Y |   |
| Rod Dysfunction Syndrome                        | <i>CACNA1F</i>            | Y |   |
| Intellectual disability                         | <i>KDM5B</i>              | Y |   |
| Mitochondrial disorders                         | <i>PNPT1</i>              | Y |   |
| Hereditary spastic paraplegia                   | <i>FA2H</i>               | Y |   |
| Ocular and oculo-cutaneous albinism             | <i>OCA2</i>               | Y |   |
| Rod-cone dystrophy                              | <i>SNRNP200</i>           | Y |   |
| Intellectual disability                         | <i>SPG7</i>               | Y |   |
| Rod-cone dystrophy                              | <i>USH2A</i>              | Y |   |
| Mitochondrial disorders                         | <i>BOLA3</i>              | Y |   |
| Paediatric motor neuronopathies                 | <i>MFN2</i>               | Y |   |
| Inherited macular dystrophy                     | <i>BEST1</i>              | Y |   |
| Rod-cone dystrophy                              | <i>PRPF31</i>             | Y |   |
| Posterior segment abnormalities                 | <i>ABCA4</i>              | Y |   |
| Rod-cone dystrophy                              | <i>CRB1</i>               | Y |   |
| Rod-cone dystrophy                              | <i>FAM161A</i>            | Y |   |
| Inherited macular dystrophy                     | <i>ABCA4</i>              | Y |   |
| Cone Dysfunction Syndrome                       | <i>ABCA4</i>              | Y |   |
| Hereditary spastic paraplegia                   | <i>ZFYVE26</i>            | Y |   |
| Intellectual disability                         | <i>EXOSC3 or<br/>COQ2</i> | Y |   |
| Congenital hearing impairment (profound/severe) | <i>SGSH</i>               | Y |   |
| Non-CF bronchiectasis                           | <i>SPAG1</i>              |   | Y |
| Congenital hearing impairment (profound/severe) | <i>USH2A</i>              |   | Y |
| Cone Dysfunction Syndrome                       | <i>CNGB3</i>              |   | Y |
| Rod-cone dystrophy                              | <i>PRCD</i>               |   | Y |
| Intellectual disability                         | <i>SLC2A1</i>             |   | Y |

|                                                                   |                |   |
|-------------------------------------------------------------------|----------------|---|
| Ocular and oculo-cutaneous albinism                               | <i>GPR143</i>  | Y |
| Congenital hearing impairment (profound/severe)                   | <i>USH2A</i>   | Y |
| Mitochondrial disorders                                           | <i>PDHA1</i>   | Y |
| Epileptic encephalopathy                                          | <i>SMC1A</i>   | Y |
| Corneal abnormalities                                             | <i>SLC4A11</i> | Y |
| Rod-cone dystrophy                                                | <i>USH2A</i>   | Y |
| Anophthalmia/microphthalmia                                       | <i>BCOR</i>    | Y |
| Intellectual disability                                           | <i>MED13L</i>  | Y |
| Rod Dysfunction Syndrome                                          | <i>TRPM1</i>   | Y |
| Rod-cone dystrophy                                                | <i>RS1</i>     | Y |
| Cataracts                                                         | <i>CRYBA1</i>  | Y |
| Rod-cone dystrophy                                                | <i>CNGB3</i>   | Y |
| Cataracts                                                         | <i>RHO</i>     | Y |
| Posterior segment abnormalities                                   | <i>GUCY2D</i>  | Y |
| Leber Congenital Amaurosis / Early-Onset Severe Retinal Dystrophy | <i>PRPF8</i>   | Y |
| Ocular and oculo-cutaneous albinism                               | <i>TYR</i>     | Y |
| Rod-cone dystrophy                                                | <i>CRB1</i>    | Y |
| Cataracts                                                         | <i>GJA3</i>    | Y |
| Cataracts                                                         | <i>CRYAA</i>   | Y |
| Cataracts                                                         | <i>GJA3</i>    | Y |
| Charcot-Marie-Tooth disease                                       | <i>BICD2</i>   | Y |
| Rod-cone dystrophy                                                | <i>PDE6B</i>   | Y |
| Posterior segment abnormalities                                   | <i>ABCA4</i>   | Y |
| Posterior segment abnormalities                                   | <i>ABCA4</i>   | Y |
| Intellectual disability                                           | <i>LRP2</i>    | Y |

482 **Table S10. Diagnostic odyssey for participant with a *TCN2* diagnosis.**

483

| Treatment specialty                 | Inpatient  |                | Outpatient |             | Emergency care |             | All secondary care |                |
|-------------------------------------|------------|----------------|------------|-------------|----------------|-------------|--------------------|----------------|
|                                     | Admissions | Cost           | Admissions | Cost        | Admissions     | Cost        | Admissions         | Cost           |
| Trauma and Orthopaedic Service      |            |                | 1          | £140        |                |             | 1                  | £140           |
| Paediatric Intensive Care Service   | 2          | £21,750        |            |             |                |             | 2                  | £21,750        |
| Paediatric Medical Oncology Service | 1          | £12,531        |            |             |                |             | 1                  | £12,531        |
| Paediatric Service                  | 6          | £42,121        | 1          | £203        |                |             | 7                  | £42,324        |
| Neonatal Critical Care Service      | 1          | £2,143         | 1          | £175        |                |             | 2                  | £2,318         |
| Well Baby Service                   | 1          | £698           |            |             |                |             | 1                  | £698           |
| Emergency care                      |            |                |            |             | 2              | £238        | 2                  | £238           |
| <b>Total</b>                        | <b>11</b>  | <b>£79,243</b> | <b>3</b>   | <b>£518</b> | <b>2</b>       | <b>£238</b> | <b>16</b>          | <b>£79,999</b> |

484

485 **Table S11: Diagnostic odyssey for participant with a *CTPS1* diagnosis.**

486

| Treatment specialty                                | Inpatient  |                 | Outpatient |                | Emergency care |             | All secondary care |                 |
|----------------------------------------------------|------------|-----------------|------------|----------------|----------------|-------------|--------------------|-----------------|
|                                                    | Admissions | Cost            | Admissions | Admissions     | Admissions     | Cost        | Admissions         | Cost            |
| General Surgery Service                            | 1          | £1,431          | 2          | £286           |                |             | 3                  | £1,717          |
| Ear Nose and Throat Service                        |            |                 | 2          | £160           |                |             | 2                  | £160            |
| Paediatric Surgery                                 | 3          | £6,095          | 1          | £196           |                |             | 4                  | £6,291          |
| Paediatric Clinical Haematology Service            | 9          | £177,841        | 18         | £4,063         |                |             | 27                 | £181,904        |
| Paediatric Clinical Immunology and Allergy Service | 2          | £1,257          | 16         | £2,922         |                |             | 18                 | £4,179          |
| Paediatric Respiratory Medicine Service            |            |                 | 4          | £569           |                |             | 4                  | £569            |
| Community Paediatric Service                       |            |                 | 148        | £35,991        |                |             | 148                | £35,991         |
| Clinical Genetics Service                          |            |                 | 3          | £1,566         |                |             | 3                  | £1,566          |
| Paediatric Cardiology Service                      |            |                 | 2          | £474           |                |             | 2                  | £474            |
| Dermatology Service                                | 1          | £1,068          | 4          | £462           |                |             | 5                  | £1,530          |
| Paediatric Service                                 | 30         | £108,189        | 44         | £8,188         |                |             | 74                 | £116,377        |
| Paediatric Neurology Service                       | 1          | £3,536          | 3          | £1,106         |                |             | 4                  | £4,642          |
| Dietetics Service                                  |            |                 | 11         | £781           |                |             | 11                 | £781            |
| Emergency care                                     |            |                 |            |                | 2              | £391        | 2                  | £391            |
| <b>Total</b>                                       | <b>47</b>  | <b>£299,417</b> | <b>258</b> | <b>£56,763</b> | <b>2</b>       | <b>£391</b> | <b>307</b>         | <b>£356,571</b> |

487

488

489 **Table S12. Pilot diagnostic yield for NHS Genomic Medicine Service clinical indications (>10 pilot cases available).**

490

| Clinical indication name                                       | 100,000 Genomes Project recruited disease categories                                                                                                                                                                                          | Pilot cases | Diagnostic yield |
|----------------------------------------------------------------|-----------------------------------------------------------------------------------------------------------------------------------------------------------------------------------------------------------------------------------------------|-------------|------------------|
| Intellectual disability – microarray, fragile X and sequencing | Intellectual disability                                                                                                                                                                                                                       | 132         | 40%              |
| Hereditary ataxia with onset in adulthood                      | Hereditary ataxia with age at recruitment > 18yr                                                                                                                                                                                              | 107         | 26%              |
| Hereditary ataxia with onset in childhood                      | Hereditary ataxia with age at recruitment <= 18yr                                                                                                                                                                                             | 13          | 38%              |
| Early onset or syndromic epilepsy                              | Epileptic encephalopathy, Familial Genetic Generalised Epilepsies, Familial Focal Epilepsies                                                                                                                                                  | 27          | 26%              |
| Adult onset hereditary spastic paraplegia                      | Hereditary spastic paraplegia with age at recruitment > 18yr                                                                                                                                                                                  | 64          | 39%              |
| Skeletal dysplasia                                             | Kyphoscoliotic Ehlers-Danlos syndrome , Multiple Epiphyseal Dysplasia, Thoracic dystrophies Unexplained skeletal dysplasia                                                                                                                    | 18          | 6%               |
| Cystic renal disease                                           | Cystic kidney disease                                                                                                                                                                                                                         | 27          | 22%              |
| Bilateral congenital or childhood onset cataracts              | Cataracts                                                                                                                                                                                                                                     | 23          | 48%              |
| Adult onset neurodegenerative disorder                         | Amyotrophic lateral sclerosis/motor neuron disease, Complex Parkinsonism (includes pallido-pyramidal syndromes), Early onset and familial Parkinson's Disease, Early onset dementia (encompassing fronto-temporal dementia and prion disease) | 31          | 20%              |
| Congenital myopathy                                            | Congenital myopathy                                                                                                                                                                                                                           | 25          | 20%              |
| Thoracic aortic aneurysm or dissection                         | Familial Thoracic Aortic Aneurysm Disease                                                                                                                                                                                                     | 30          | 10%              |
| Primary immunodeficiency                                       | A- or hypo-gammaglobulinaemia, Agranulocytosis, Combined B and T cell defect, Congenital neutropaenia , SCID                                                                                                                                  | 16          | 25%              |
| Proteinuric renal disease                                      | Proteinuric renal disease                                                                                                                                                                                                                     | 11          | 46%              |
| Bardet-Biedl syndrome                                          | Bardet-Biedl syndrome                                                                                                                                                                                                                         | 14          | 58%              |



|                                                                |                                                                                                                                                                                                                                                                               |     |     |
|----------------------------------------------------------------|-------------------------------------------------------------------------------------------------------------------------------------------------------------------------------------------------------------------------------------------------------------------------------|-----|-----|
| Retinal disorders                                              | Rod-cone dystrophy, Cone Dysfunction Syndrome, Inherited macular dystrophy, Leber Congenital Amaurosis / Early-Onset Severe Retinal Dystrophy, Rod Dysfunction Syndrome, Developmental macular and foveal dystrophy                                                           | 196 | 46% |
| Structural eye disease                                         | Ocular coloboma, Anophthalmia or microphthalmia, Glaucoma                                                                                                                                                                                                                     | 16  | 33% |
| Non-syndromic hearing loss                                     | Congenital hearing impairment (profound/severe), Autosomal dominant deafness                                                                                                                                                                                                  | 56  | 46% |
| Adult onset dystonia, chorea or related movement disorder      | Early onset dystonia with age at recruitment > 18yr                                                                                                                                                                                                                           | 25  | 24% |
| Paroxysmal central nervous system disorders                    | Brain channelopathy, Skeletal Muscle Channelopathies, Kleine-Levin syndrome                                                                                                                                                                                                   | 28  | 7%  |
| Congenital malformation and dysmorphism syndromes              | Bilateral microtia, Choanal atresia, Ear malformations, Familial hemifacial microsomia, Familial non-syndromic clefting, Kabuki syndrome, Paediatric congenital malformation-dysmorphism-tumour syndromes, Rare multisystem ciliopathy disorders, RASopathies, Sotos syndrome | 24  | 25% |
| Hereditary neuropathy or pain disorder – NOT PMP22 copy number | Charcot-Marie-Tooth disease, Paediatric motor neuronopathies                                                                                                                                                                                                                  | 101 | 35% |
| Other rare neuromuscular disorders                             | Distal myopathies, Rhabdomyolysis and metabolic muscle disorders                                                                                                                                                                                                              | 19  | 16% |
| Possible mitochondrial disorder - nuclear genes                | Mitochondrial disorders                                                                                                                                                                                                                                                       | 76  | 40% |

491

492
